# Supplementary material for: Hydronopylformamides: Modification of the Naturally Occurring Compound (-)-β-Pinene to Produce Insect Repellent Candidates against Blattella germanica
Source: PubMed Central journal article supplement (PMC6152770; doi:10.3390/molecules22061004), 2017-06-16
Supplement: molecules-22-01004-s001.pdf [file molecules-22-01004-s001.pdf]

# FTIR Spectrums of compound 8a-8g

## Compound 8a

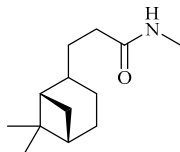

3-((1S,5S)-6,6-dimethylbicyclo[3.1.1]heptan-2-yl)-N-methylpropanamide

## FTIR of compound 8a

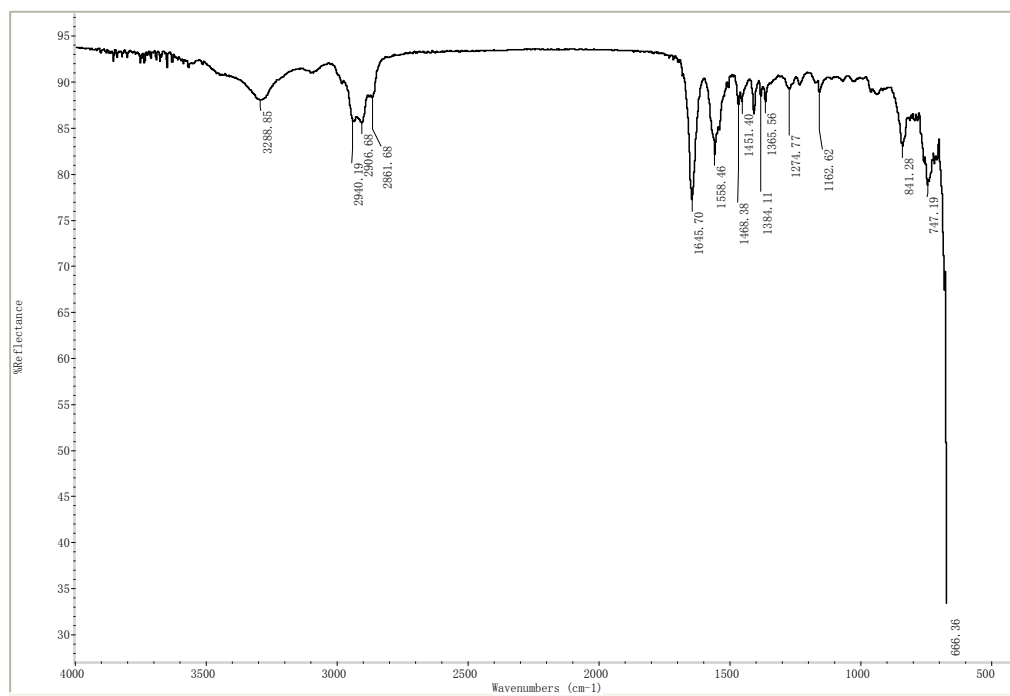

## Compound 8b

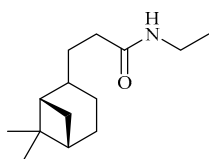

3-((1S,5S)-6,6-dimethylbicyclo[3.1.1]heptan-2-yl)-N-ethylpropanamide

### FTIR of compound 8b

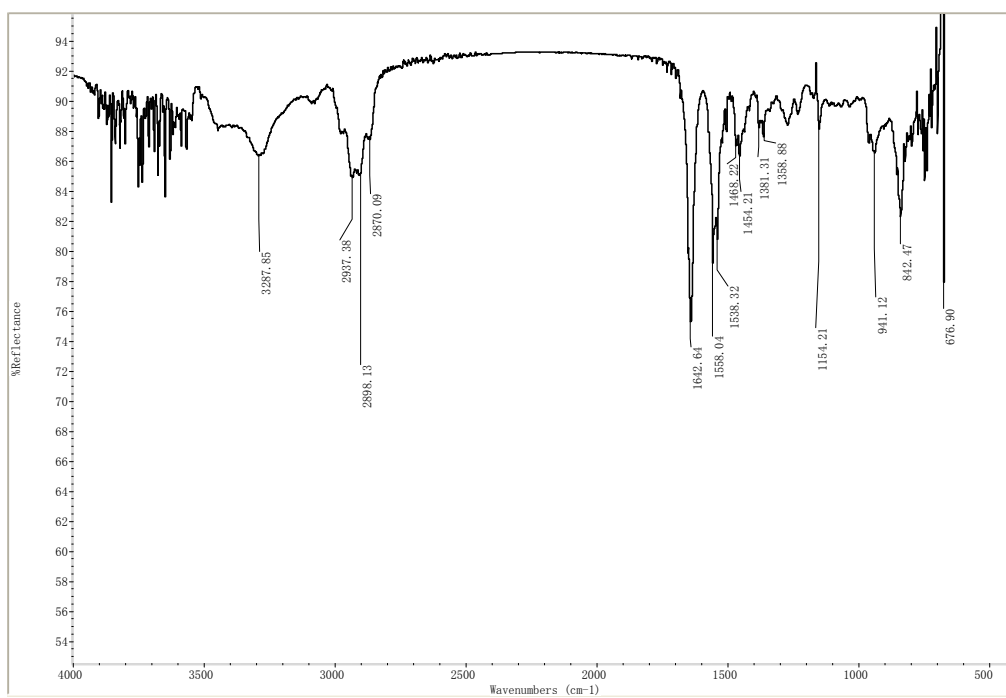

## Compound 8c

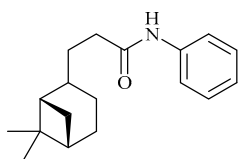

3-((1S,5S)-6,6-dimethylbicyclo[3.1.1]heptan-2-yl)-N-phenylpropanamide

### FTIR of compound 8c

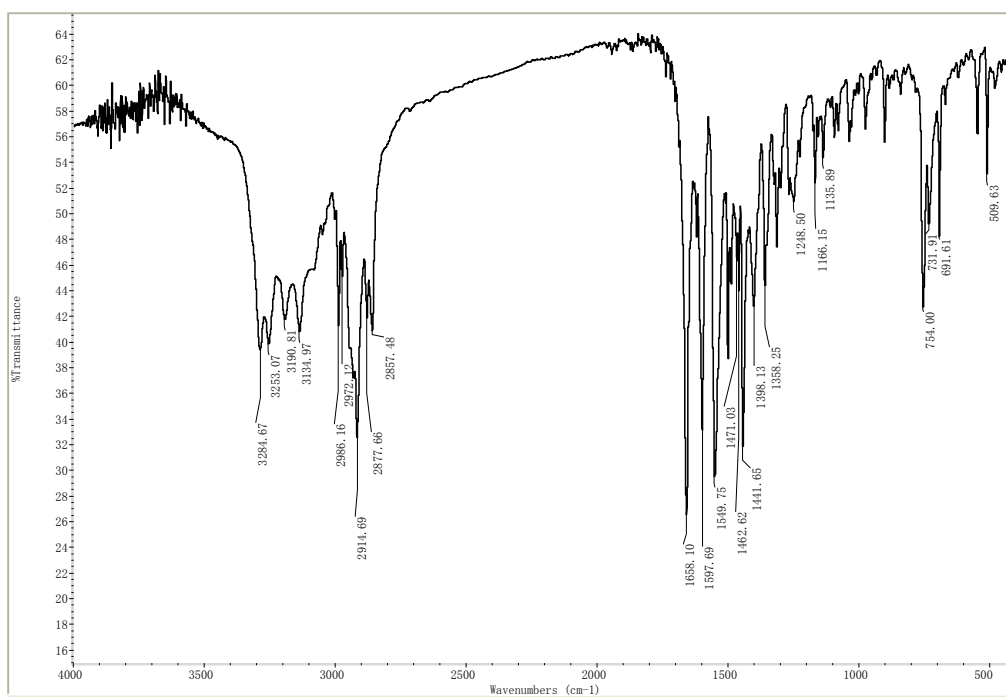

## Compound 8d

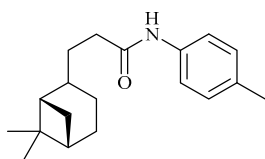

3-((1S,5S)-6,6-dimethylbicyclo[3.1.1]heptan-2-yl)-N-(p-tolyl)propanamide

### FTIR of compound 8d

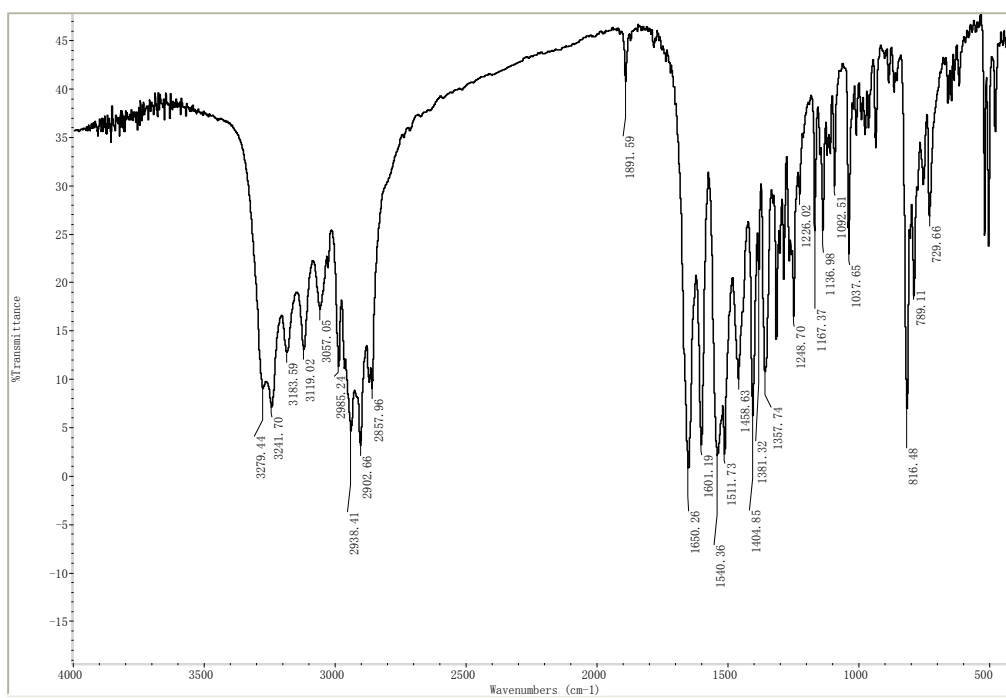

## Compound 8e

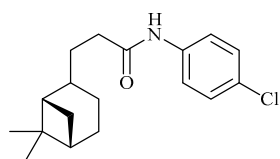

N-(4-chlorophenyl)-3-((1S,5S)-6,6-dimethylbicyclo[3.1.1]heptan-2-yl)propanamide

### FTIR of compound 8e

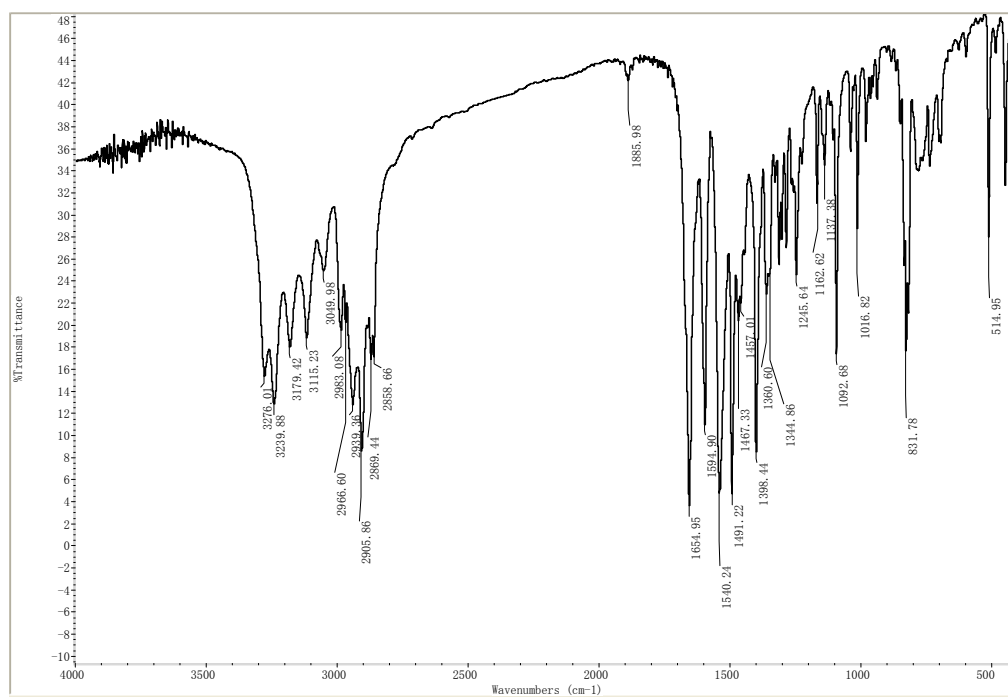

## Compound 8f

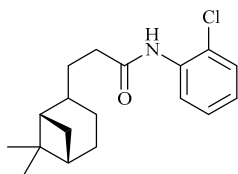

N-(2-chlorophenyl)-3-((1S,5S)-6,6-dimethylbicyclo[3.1.1]heptan-2-yl)propanamide

### FTIR of compound 8f

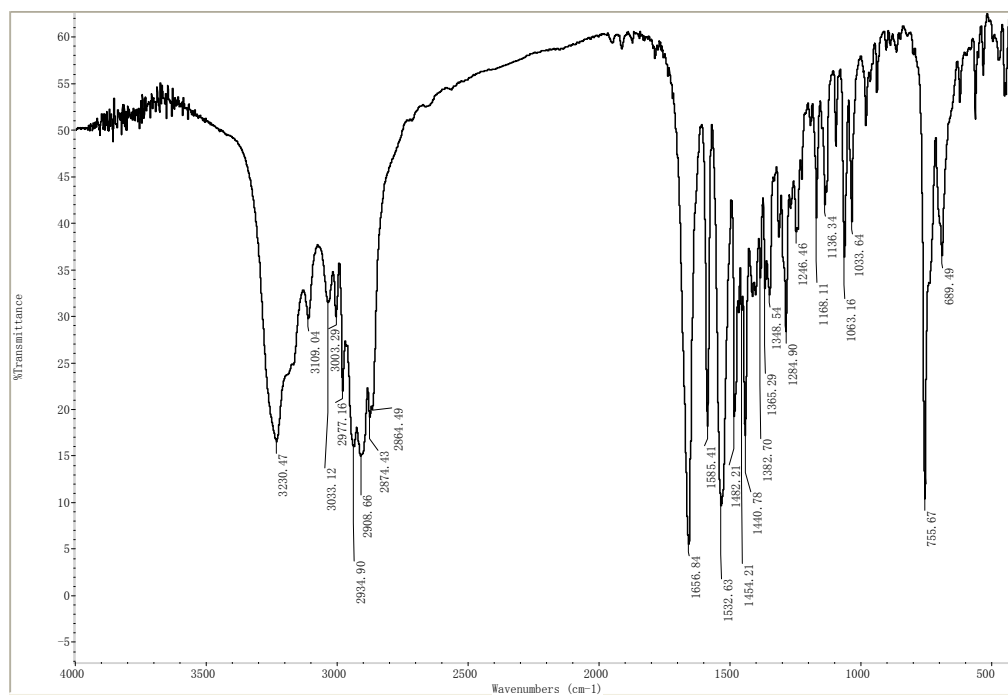

## Compound 8g

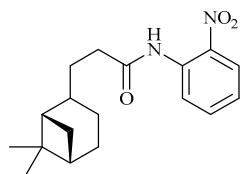

3-((1S,5S)-6,6-dimethylbicyclo[3.1.1]heptan-2-yl)-N-(2-nitrophenyl)propanamide

### FTIR of compound 8g

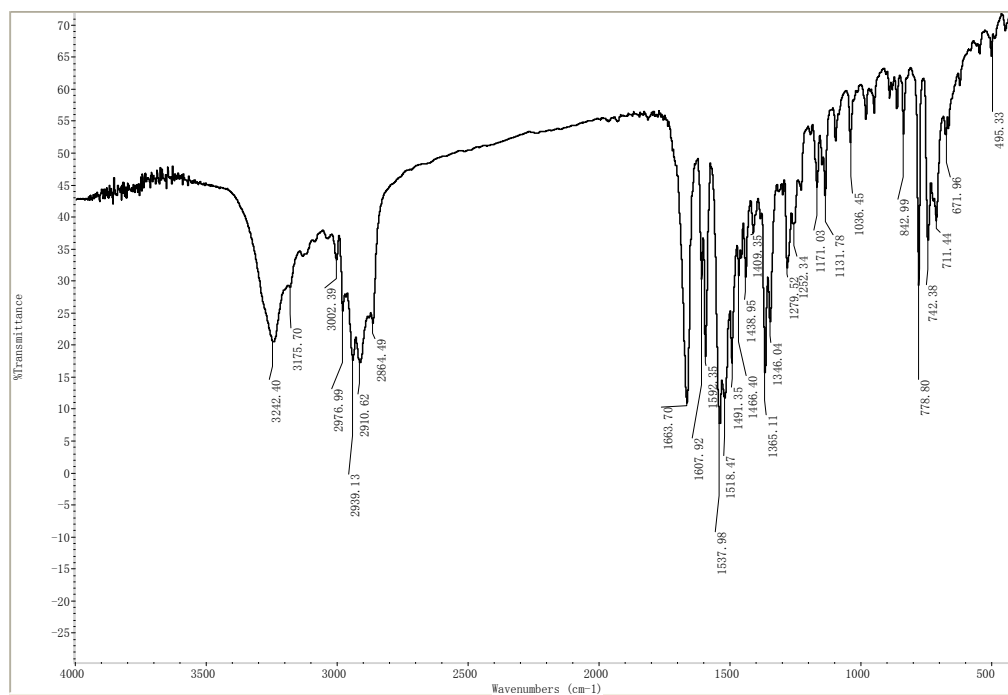

# NMR spectrums of compound 8a-8g

<sup>1</sup>H NMR of compound 8a:

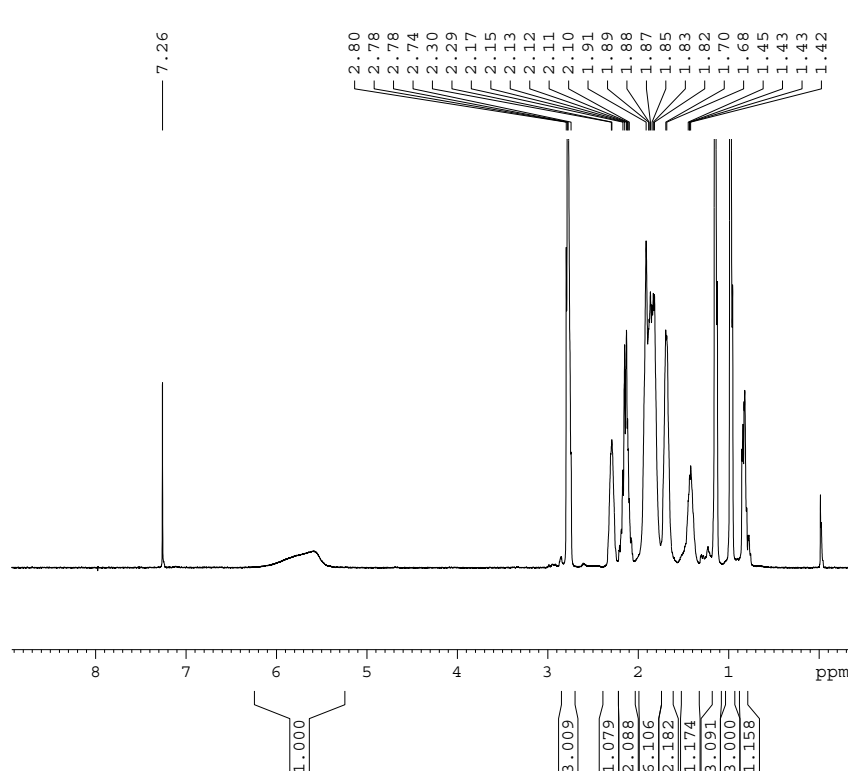

```

Current Data Parameters
NAME      nongda-1
EXPNO    1
PROCNO   1

F2 - Acquisition Parameters
Date_    20140102
Time     21.46
INSTRUM spect
PROBHD   5 mm QNP 1H/1
PULPROG zg30
TD        65536
SOLVENT  CDCl3
NS        4
DS        2
SWH      8278.146 Hz
FIDRES   0.126314 Hz
AQ        3.9584243 sec
RG        114
DW        60.400 usec
DE        6.00 usec
TE        289.3 K
D1        2.00000000 sec
MCREST    0.00000000 sec
MCWRK     0.01500000 sec

===== CHANNEL f1 =====
NUC1      1H
P1        14.80 usec
PL1       -2.00 dB
SFO1      400.1332010 MHz

F2 - Processing parameters
SI        32768
SF        400.1300096 MHz
WDW       EM
SSB       0
LB        0.30 Hz
GB        0
PC        1.00
    
```

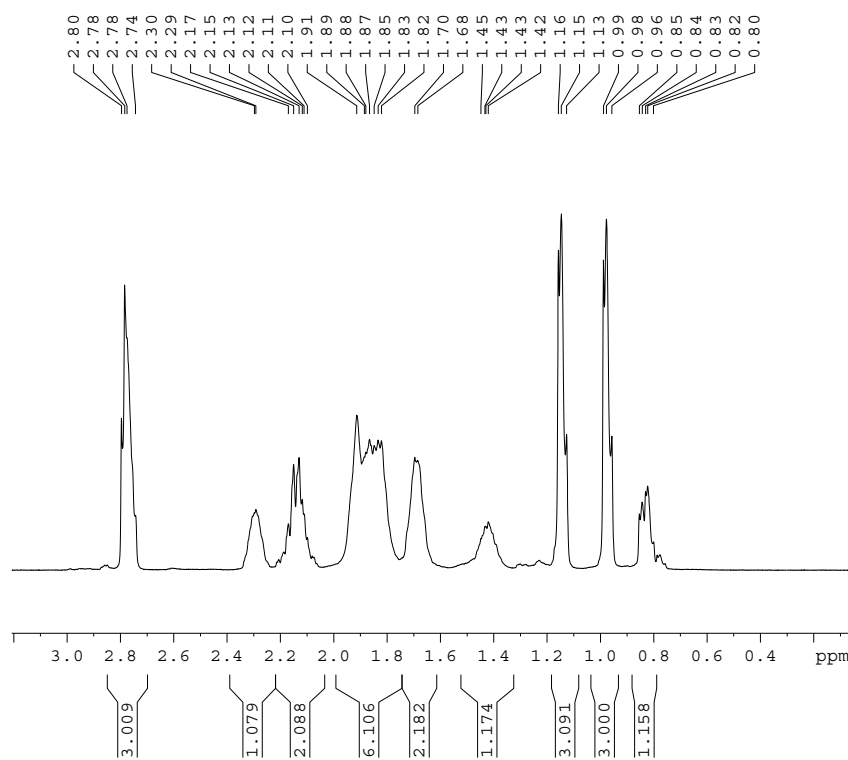

```

Current Data Parameters
NAME      nongda-1
EXPNO    1
PROCNO   1

F2 - Acquisition Parameters
Date_    20140102
Time     21.46
INSTRUM spect
PROBHD   5 mm QNP 1H/1
PULPROG zg30
TD        65536
SOLVENT  CDCl3
NS        4
DS        2
SWH      8278.146 Hz
FIDRES   0.126314 Hz
AQ        3.9584243 sec
RG        114
DW        60.400 usec
DE        6.00 usec
TE        289.3 K
D1        2.00000000 sec
MCREST    0.00000000 sec
MCWRK     0.01500000 sec

===== CHANNEL f1 =====
NUC1      1H
P1        14.80 usec
PL1       -2.00 dB
SFO1      400.1332010 MHz

F2 - Processing parameters
SI        32768
SF        400.1300096 MHz
WDW       EM
SSB       0
LB        0.30 Hz
GB        0
PC        1.00
    
```



<sup>13</sup>C NMR of compound 8a:

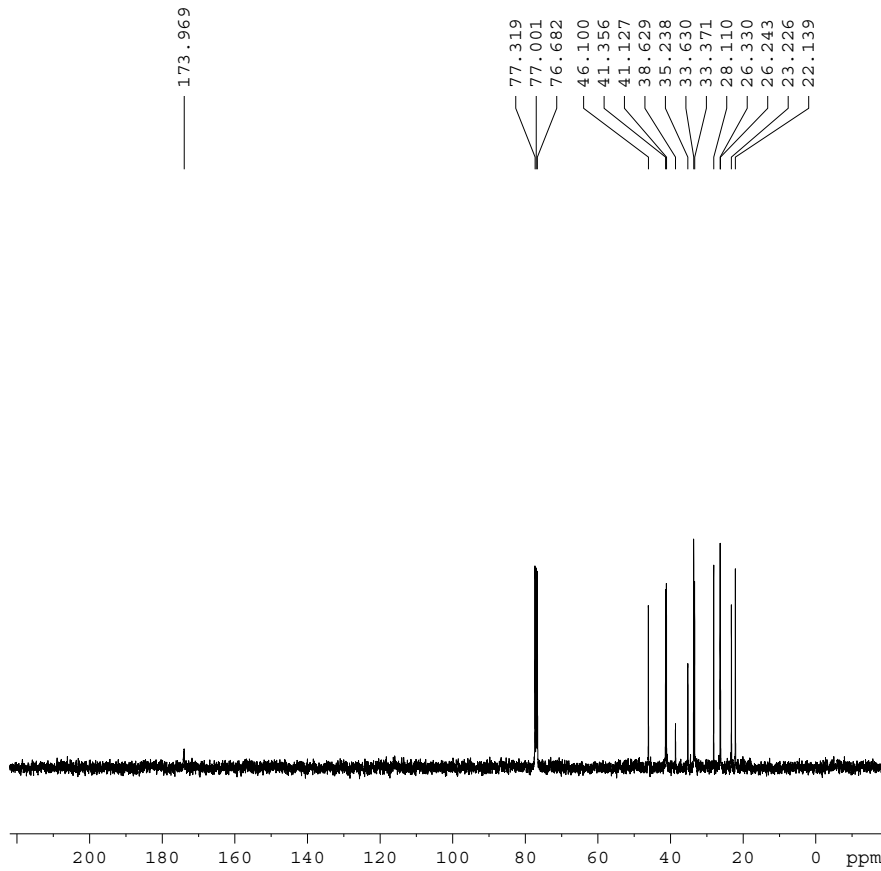

```

Current Data Parameters
NAME      nongda-1
EXPNO    2
PROCNO   1

F2 - Acquisition Parameters
Date      20140102
Time      21.47
INSTRUM  spect
PROBHD   5 mm QNP 1H/1
PULPROG  zgdc30
TD        32768
SOLVENT  DMSO
NS        120
DS        0
SWH       24154.590 Hz
FIDRES    0.737140 Hz
AQ        0.6783476 sec
RG        362
DW        20.700 usec
DE        6.00 usec
TE        289.9 K
D1        1.00000000 sec
d11       0.03000000 sec
MCREST    0.00000000 sec
MCWRK    0.01500000 sec

===== CHANNEL f1 =====
NUC1      13C
P1        12.00 usec
PL1       -3.00 dB
SFO1     100.6230315 MHz

===== CHANNEL f2 =====
CPDPRG2  waltz16
NUC2      1H
PCPD2    80.00 usec
PL2       -4.00 dB
PL12     12.12 dB
SFO2     400.1313965 MHz

F2 - Processing parameters
SI        131072
SF        100.6127747 MHz
WDW       EM
SSB       0
LB        3.00 Hz
GB        0
PC        0.50
    
```

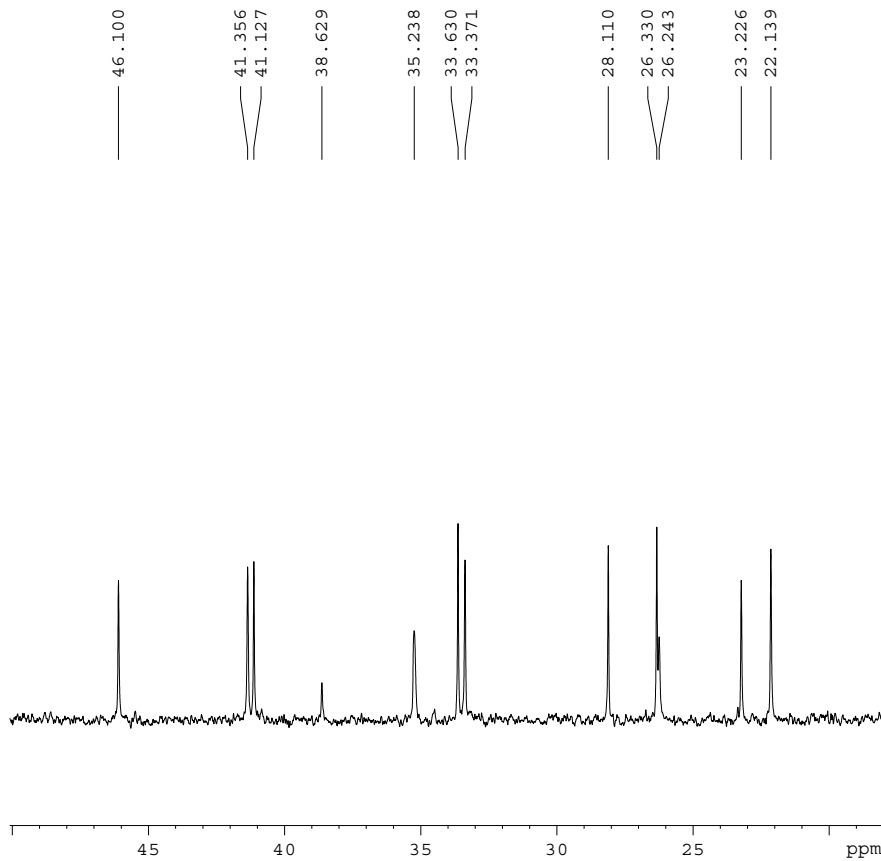

```

Current Data Parameters
NAME      nongda-1
EXPNO    2
PROCNO   1

F2 - Acquisition Parameters
Date      20140102
Time      21.47
INSTRUM  spect
PROBHD   5 mm QNP 1H/1
PULPROG  zgdc30
TD        32768
SOLVENT  DMSO
NS        120
DS        0
SWH       24154.590 Hz
FIDRES    0.737140 Hz
AQ        0.6783476 sec
RG        362
DW        20.700 usec
DE        6.00 usec
TE        289.9 K
D1        1.00000000 sec
d11       0.03000000 sec
MCREST    0.00000000 sec
MCWRK    0.01500000 sec

===== CHANNEL f1 =====
NUC1      13C
P1        12.00 usec
PL1       -3.00 dB
SFO1     100.6230315 MHz

===== CHANNEL f2 =====
CPDPRG2  waltz16
NUC2      1H
PCPD2    80.00 usec
PL2       -4.00 dB
PL12     12.12 dB
SFO2     400.1313965 MHz

F2 - Processing parameters
SI        131072
SF        100.6127747 MHz
WDW       EM
SSB       0
LB        3.00 Hz
GB        0
PC        0.50
    
```

<sup>1</sup>H NMR of compound 8b:

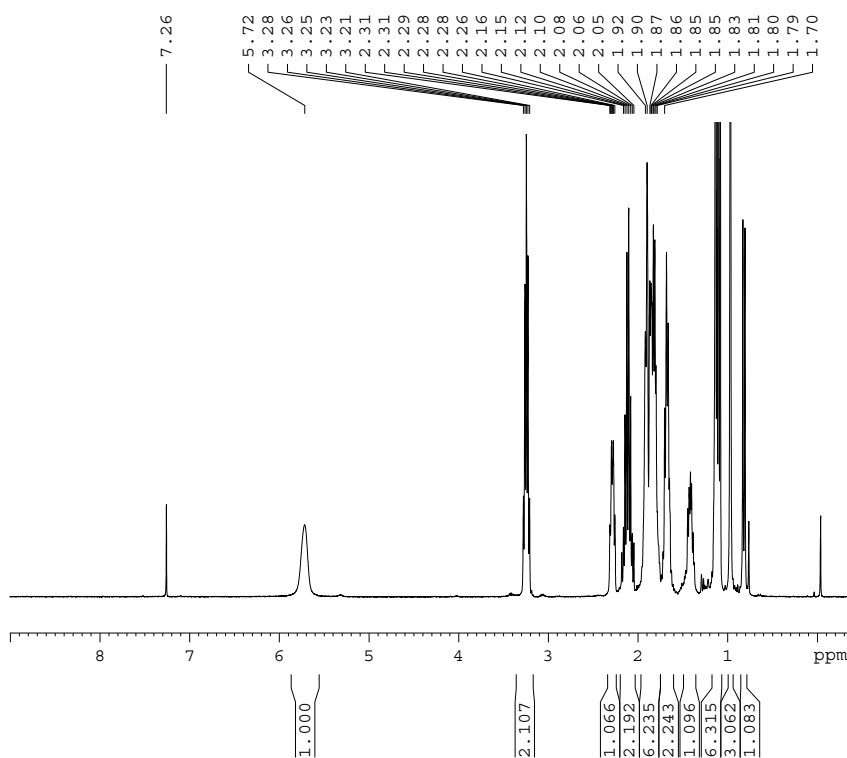

```

Current Data Parameters
NAME          nongda-2
EXPNO         1
PROCNO        1

F2 - Acquisition Parameters
Date_         20140105
Time_         14.48
INSTRUM       spect
PROBHD        5 mm QNP 1H/1
PULPROG       zg30
TD            65536
SOLVENT       CDCl3
NS            4
DS            2
SWH           8278.146 Hz
FIDRES        0.126314 Hz
AQ            3.9584243 sec
RG            57
DW            60.400 usec
DE            6.00 usec
TE            288.2 K
D1            2.00000000 sec
MCREST        0.00000000 sec
MCWRK         0.01500000 sec

===== CHANNEL f1 =====
NUC1          1H
P1            14.80 usec
PL1           -2.00 dB
SF01          400.1332010 MHz

F2 - Processing parameters
SI            32768
SF            400.1300096 MHz
WDW           EM
SSB           0
LB            0.30 Hz
GB            0
PC            1.00
    
```

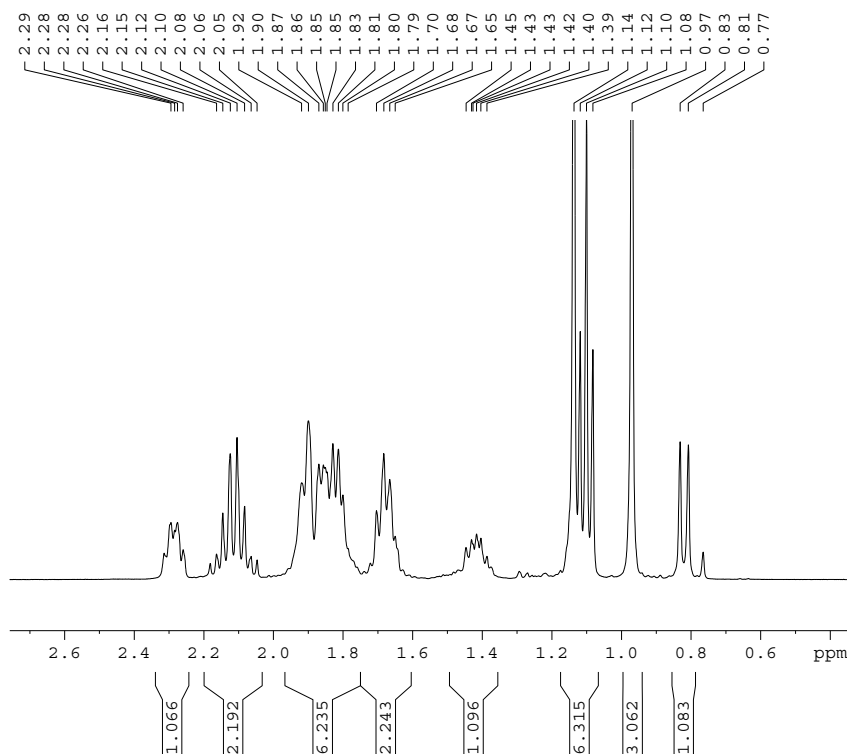

```

Current Data Parameters
NAME          nongda-2
EXPNO         1
PROCNO        1

F2 - Acquisition Parameters
Date_         20140105
Time_         14.48
INSTRUM       spect
PROBHD        5 mm QNP 1H/1
PULPROG       zg30
TD            65536
SOLVENT       CDCl3
NS            4
DS            2
SWH           8278.146 Hz
FIDRES        0.126314 Hz
AQ            3.9584243 sec
RG            57
DW            60.400 usec
DE            6.00 usec
TE            288.2 K
D1            2.00000000 sec
MCREST        0.00000000 sec
MCWRK         0.01500000 sec

===== CHANNEL f1 =====
NUC1          1H
P1            14.80 usec
PL1           -2.00 dB
SF01          400.1332010 MHz

F2 - Processing parameters
SI            32768
SF            400.1300096 MHz
WDW           EM
SSB           0
LB            0.30 Hz
GB            0
PC            1.00
    
```

<sup>13</sup>C NMR of compound 8b:

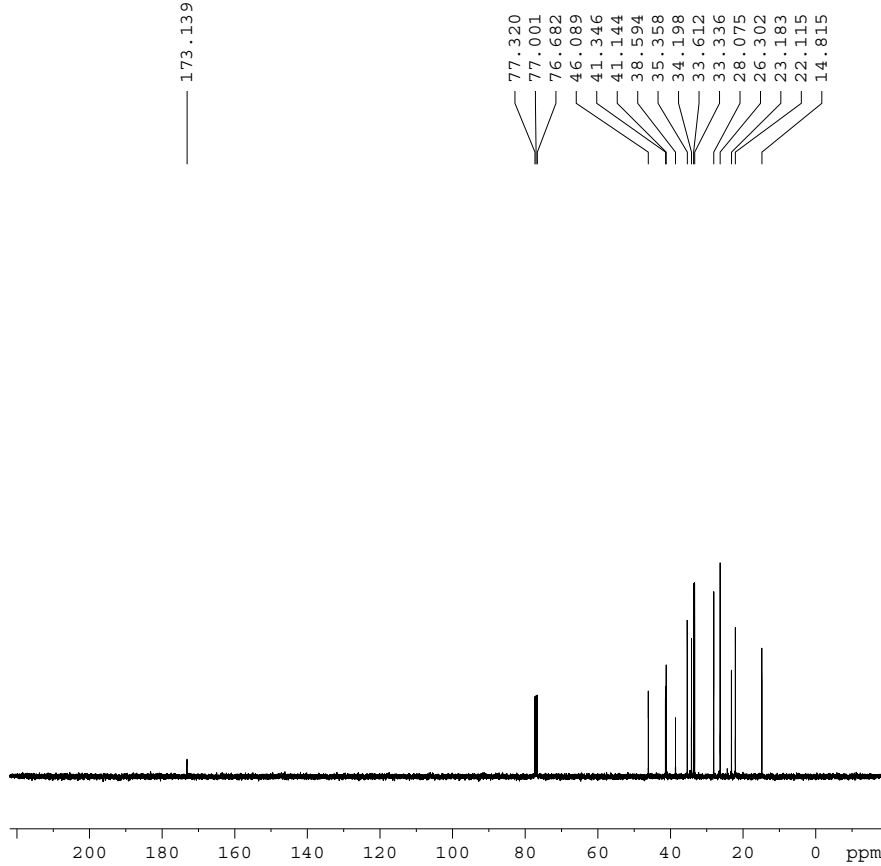

```

Current Data Parameters
NAME      nongda-2
EXPNO    2
PROCNO   1

F2 - Acquisition Parameters
Date      20140105
Time      14.54
INSTRUM   spect
PROBHD    5 mm QNP 1H/1
PULPROG   zgdc30
TD         32768
SOLVENT   Acetone
NS         147
DS         0
SWH        24154.590 Hz
FIDRES     0.737140 Hz
AQ         0.6783476 sec
RG         362
DW         20.700 usec
DE         6.00 usec
TE         289.7 K
D1         1.00000000 sec
d11        0.03000000 sec
MCREST     0.00000000 sec
MCWRK     0.01500000 sec

===== CHANNEL f1 =====
NUC1       13C
P1         12.00 usec
PL1        -3.00 dB
SFO1       100.6230315 MHz

===== CHANNEL f2 =====
CPDPRG2    waltz16
NUC2       1H
PCPD2      80.00 usec
PL2        -4.00 dB
PL12       12.12 dB
SFO2       400.1313965 MHz

F2 - Processing parameters
SI         131072
SF         100.6127777 MHz
WDW        EM
SSB        0
LB         1.00 Hz
GB         0
PC         0.50
    
```

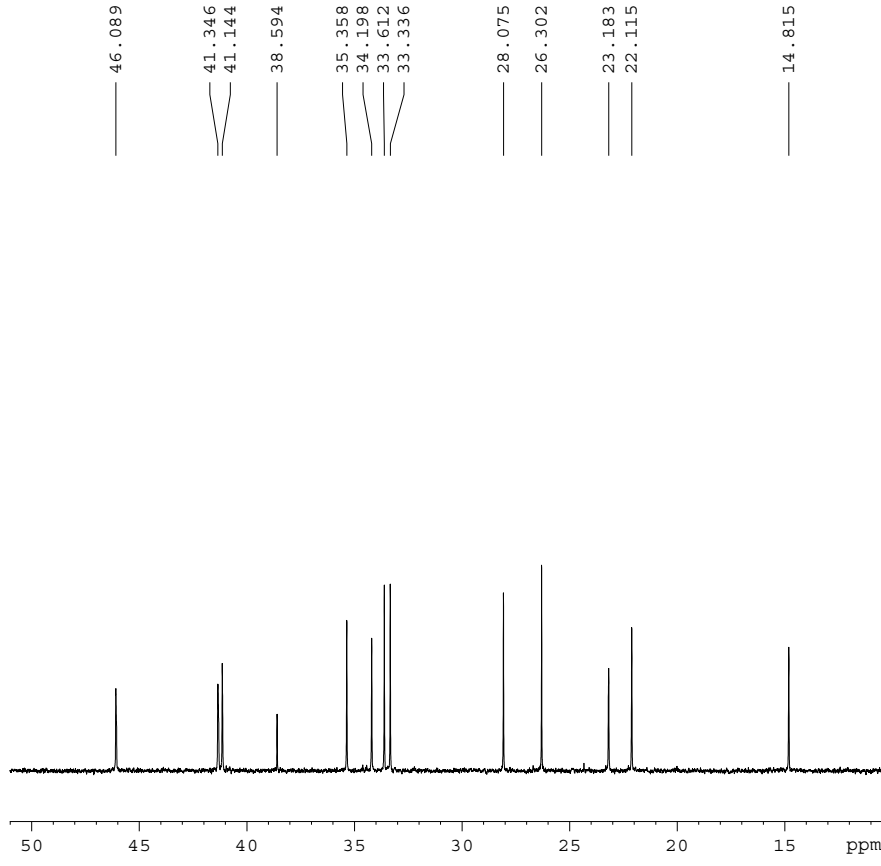

```

Current Data Parameters
NAME      nongda-2
EXPNO    2
PROCNO   1

F2 - Acquisition Parameters
Date      20140105
Time      14.54
INSTRUM   spect
PROBHD    5 mm QNP 1H/1
PULPROG   zgdc30
TD         32768
SOLVENT   Acetone
NS         147
DS         0
SWH        24154.590 Hz
FIDRES     0.737140 Hz
AQ         0.6783476 sec
RG         362
DW         20.700 usec
DE         6.00 usec
TE         289.7 K
D1         1.00000000 sec
d11        0.03000000 sec
MCREST     0.00000000 sec
MCWRK     0.01500000 sec

===== CHANNEL f1 =====
NUC1       13C
P1         12.00 usec
PL1        -3.00 dB
SFO1       100.6230315 MHz

===== CHANNEL f2 =====
CPDPRG2    waltz16
NUC2       1H
PCPD2      80.00 usec
PL2        -4.00 dB
PL12       12.12 dB
SFO2       400.1313965 MHz

F2 - Processing parameters
SI         131072
SF         100.6127777 MHz
WDW        EM
SSB        0
LB         1.00 Hz
GB         0
PC         0.50
    
```

<sup>1</sup>H NMR of compound 8c:

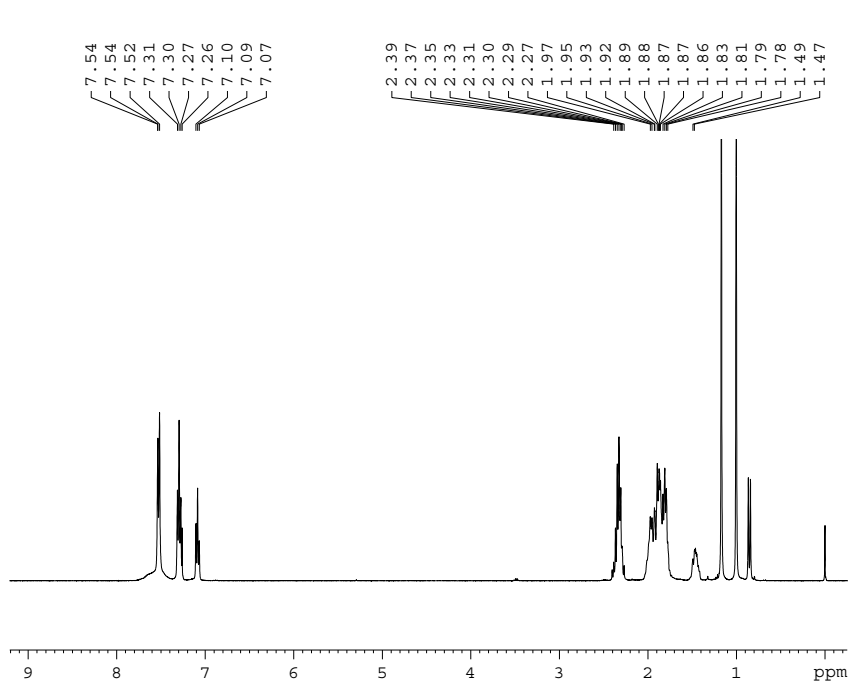

```

Current Data Parameters
NAME          nongda-3
EXPNO         1
PROCNO        1

F2 - Acquisition Parameters
Date_         20140103
Time_         14.04
INSTRUM       spect
PROBHD        5 mm QNP 1H/1
PULPROG       zg30
TD            65536
SOLVENT       Pyr
NS            4
DS            2
SWH           8278.146 Hz
FIDRES        0.126314 Hz
AQ            3.9584243 sec
RG            57
DW            60.400 usec
DE            6.00 usec
TE            288.1 K
D1            2.00000000 sec
MCREST        0.00000000 sec
MCWRK         0.01500000 sec

===== CHANNEL f1 =====
NUC1          1H
P1            14.80 usec
PL1           -2.00 dB
SFO1         400.1332010 MHz

F2 - Processing parameters
SI            32768
SF            400.1300093 MHz
WDW           EM
SSB           0
LB            0.30 Hz
GB            0
PC            1.00
    
```

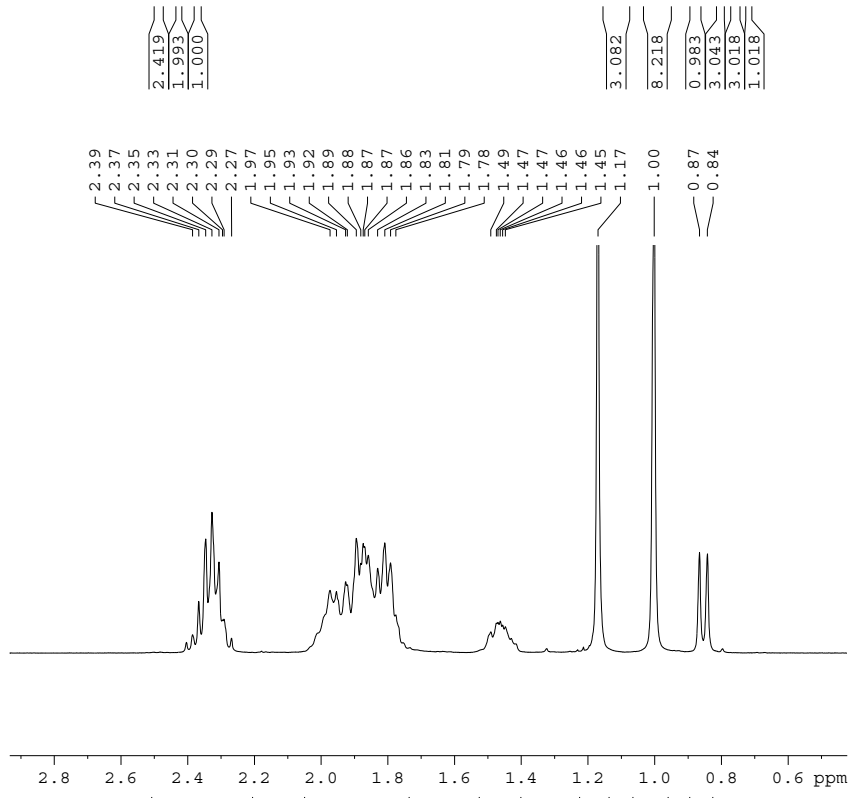

```

Current Data Parameters
NAME          nongda-3
EXPNO         1
PROCNO        1

F2 - Acquisition Parameters
Date_         20140103
Time_         14.04
INSTRUM       spect
PROBHD        5 mm QNP 1H/1
PULPROG       zg30
TD            65536
SOLVENT       Pyr
NS            4
DS            2
SWH           8278.146 Hz
FIDRES        0.126314 Hz
AQ            3.9584243 sec
RG            57
DW            60.400 usec
DE            6.00 usec
TE            288.1 K
D1            2.00000000 sec
MCREST        0.00000000 sec
MCWRK         0.01500000 sec

===== CHANNEL f1 =====
NUC1          1H
P1            14.80 usec
PL1           -2.00 dB
SFO1         400.1332010 MHz

F2 - Processing parameters
SI            32768
SF            400.1300093 MHz
WDW           EM
SSB           0
LB            0.30 Hz
GB            0
PC            1.00
    
```

<sup>13</sup>C NMR of compound 8c:

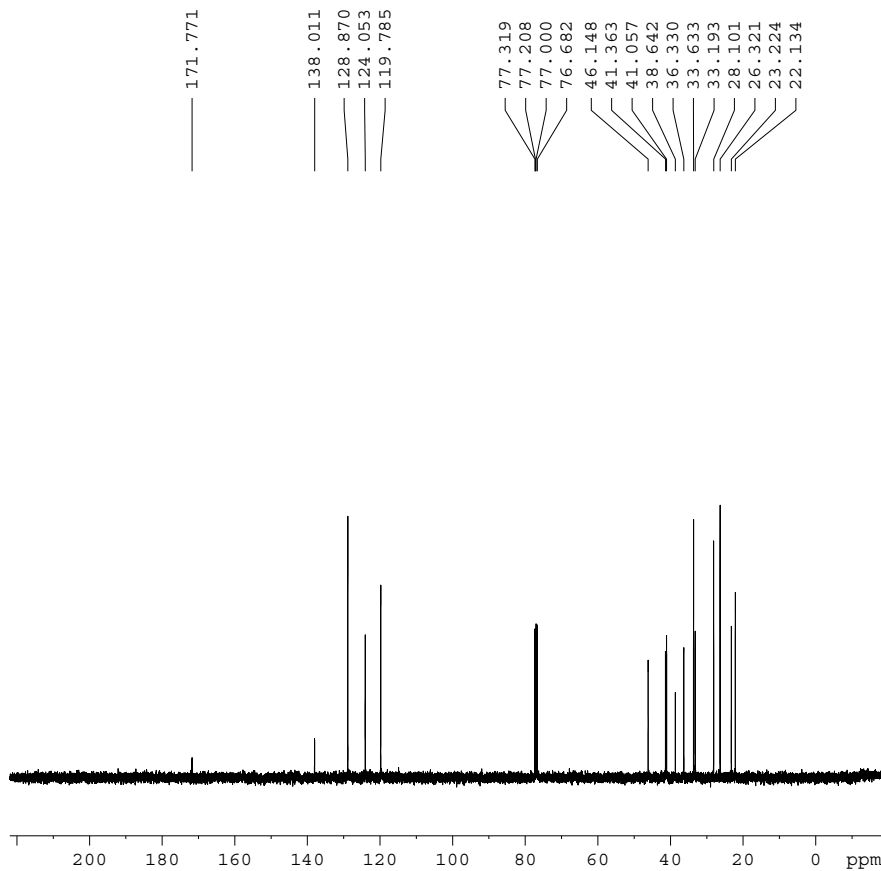

Current Data Parameters  
 NAME nongda-3-1  
 EXPNO 2  
 PROCNO 1

F2 - Acquisition Parameters  
 Date 20140106  
 Time 15.53  
 INSTRUM spect  
 PROBHD 5 mm QNP 1H/1  
 PULPROG zgdc30  
 TD 32768  
 SOLVENT Acetone  
 NS 102  
 DS 0  
 SWH 24154.590 Hz  
 FIDRES 0.737140 Hz  
 AQ 0.6783476 sec  
 RG 362  
 DW 20.700 usec  
 DE 6.00 usec  
 TE 290.5 K  
 D1 1.00000000 sec  
 d11 0.03000000 sec  
 MCREST 0.00000000 sec  
 MCWRK 0.01500000 sec

===== CHANNEL f1 =====  
 NUC1 13C  
 P1 12.00 usec  
 PL1 -3.00 dB  
 SFO1 100.6230315 MHz

===== CHANNEL f2 =====  
 CPDPRG2 waltz16  
 NUC2 1H  
 ECPD2 80.00 usec  
 PL2 -4.00 dB  
 PL12 12.12 dB  
 SFO2 400.1313965 MHz

F2 - Processing parameters  
 SI 131072  
 SF 100.6127769 MHz  
 WDW EM  
 SSB 0  
 LB 1.00 Hz  
 GB 0  
 PC 0.50

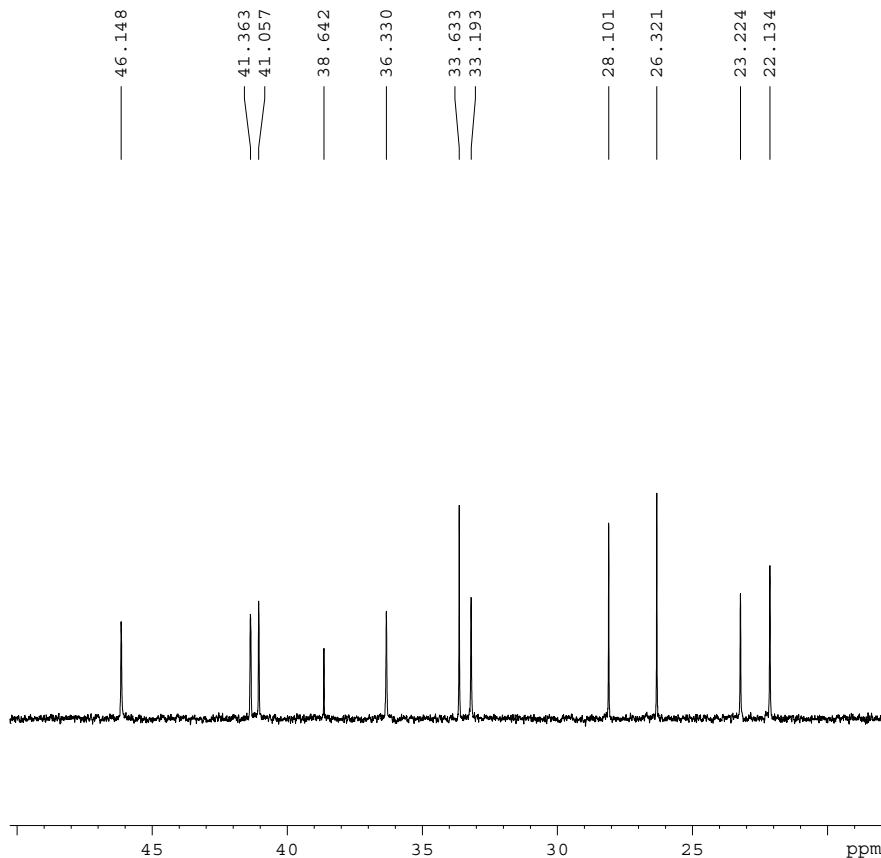

Current Data Parameters  
 NAME nongda-3-1  
 EXPNO 2  
 PROCNO 1

F2 - Acquisition Parameters  
 Date 20140106  
 Time 15.53  
 INSTRUM spect  
 PROBHD 5 mm QNP 1H/1  
 PULPROG zgdc30  
 TD 32768  
 SOLVENT Acetone  
 NS 102  
 DS 0  
 SWH 24154.590 Hz  
 FIDRES 0.737140 Hz  
 AQ 0.6783476 sec  
 RG 362  
 DW 20.700 usec  
 DE 6.00 usec  
 TE 290.5 K  
 D1 1.00000000 sec  
 d11 0.03000000 sec  
 MCREST 0.00000000 sec  
 MCWRK 0.01500000 sec

===== CHANNEL f1 =====  
 NUC1 13C  
 P1 12.00 usec  
 PL1 -3.00 dB  
 SFO1 100.6230315 MHz

===== CHANNEL f2 =====  
 CPDPRG2 waltz16  
 NUC2 1H  
 ECPD2 80.00 usec  
 PL2 -4.00 dB  
 PL12 12.12 dB  
 SFO2 400.1313965 MHz

F2 - Processing parameters  
 SI 131072  
 SF 100.6127769 MHz  
 WDW EM  
 SSB 0  
 LB 1.00 Hz  
 GB 0  
 PC 0.50

<sup>1</sup>H NMR of compound 8d:

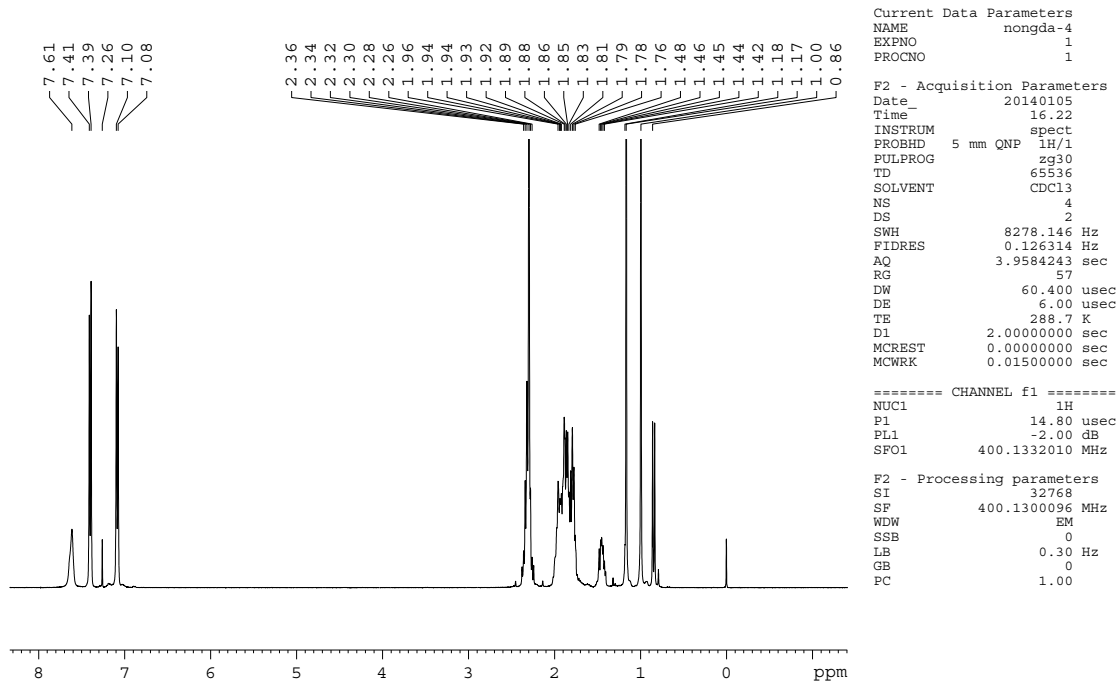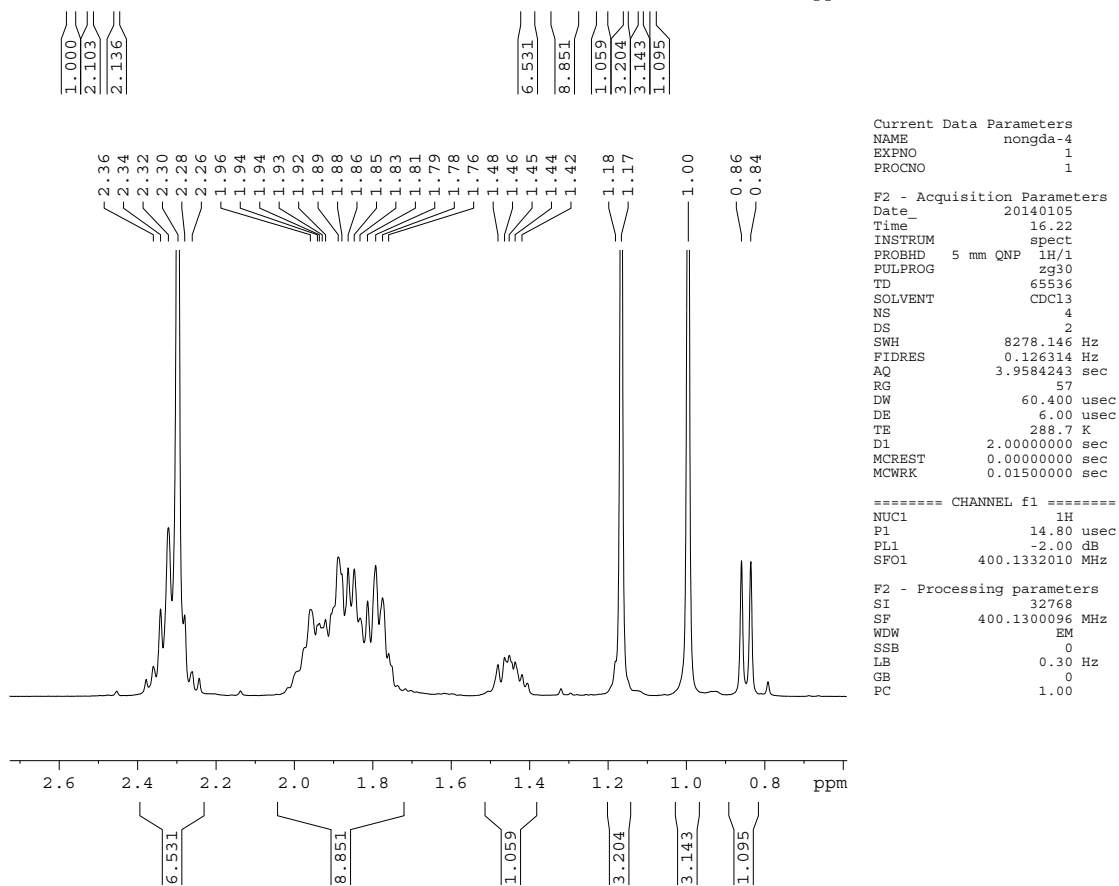

<sup>13</sup>C NMR of compound 8d:

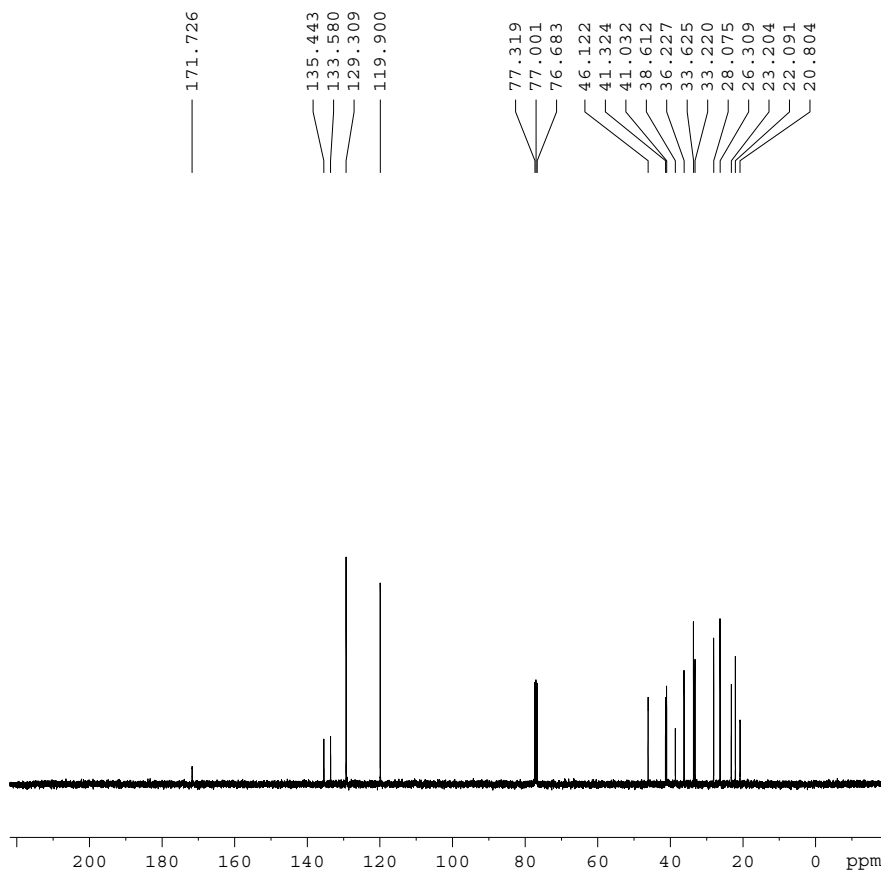

```
Current Data Parameters
NAME      nongda-4
EXPNO    2
PROCNO   1

F2 - Acquisition Parameters
Date_    20140105
Time     16.24
INSTRUM spect
PROBHD   5 mm QNP 1H/1
PULPROG zgdc30
TD       32768
SOLVENT  Acetone
NS       73
DS       0
SWH      24154.590 Hz
FIDRES   0.737140 Hz
AQ       0.6783476 sec
RG       362
DW       20.700 usec
DE       6.00 usec
TE       289.6 K
D1       1.00000000 sec
d11      0.03000000 sec
MCREST   0.00000000 sec
MCWRK    0.01500000 sec
```

```
===== CHANNEL f1 =====
NUC1    13C
P1      12.00 usec
PL1     -3.00 dB
SFO1    100.6230315 MHz
```

```
===== CHANNEL f2 =====
CPDPRG2 waltz16
NUC2     1H
PCPD2    80.00 usec
PL2      -4.00 dB
PL12     12.12 dB
SFO2     400.1313965 MHz
```

```
F2 - Processing parameters
SI       131072
SF       100.6127793 MHz
WDW      EM
SSB      0
LB       1.00 Hz
GB       0
PC       0.50
```

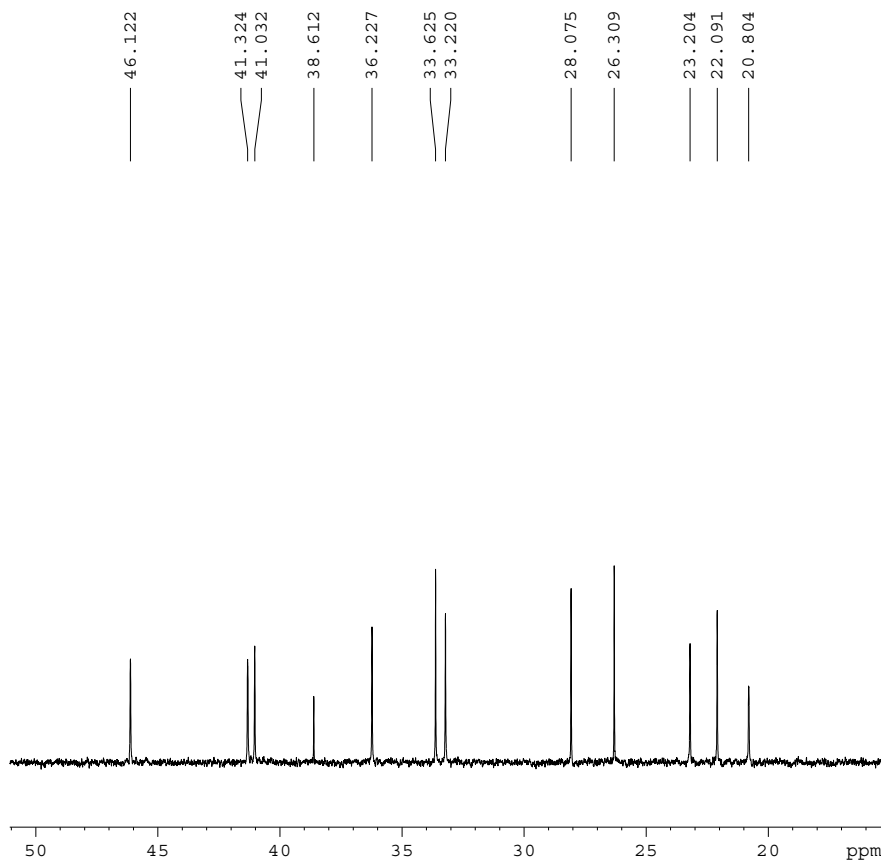

```
Current Data Parameters
NAME      nongda-4
EXPNO    2
PROCNO   1

F2 - Acquisition Parameters
Date_    20140105
Time     16.24
INSTRUM spect
PROBHD   5 mm QNP 1H/1
PULPROG zgdc30
TD       32768
SOLVENT  Acetone
NS       73
DS       0
SWH      24154.590 Hz
FIDRES   0.737140 Hz
AQ       0.6783476 sec
RG       362
DW       20.700 usec
DE       6.00 usec
TE       289.6 K
D1       1.00000000 sec
d11      0.03000000 sec
MCREST   0.00000000 sec
MCWRK    0.01500000 sec
```

```
===== CHANNEL f1 =====
NUC1    13C
P1      12.00 usec
PL1     -3.00 dB
SFO1    100.6230315 MHz
```

```
===== CHANNEL f2 =====
CPDPRG2 waltz16
NUC2     1H
PCPD2    80.00 usec
PL2      -4.00 dB
PL12     12.12 dB
SFO2     400.1313965 MHz
```

```
F2 - Processing parameters
SI       131072
SF       100.6127793 MHz
WDW      EM
SSB      0
LB       1.00 Hz
GB       0
PC       0.50
```

<sup>1</sup>H NMR of compound 8e:

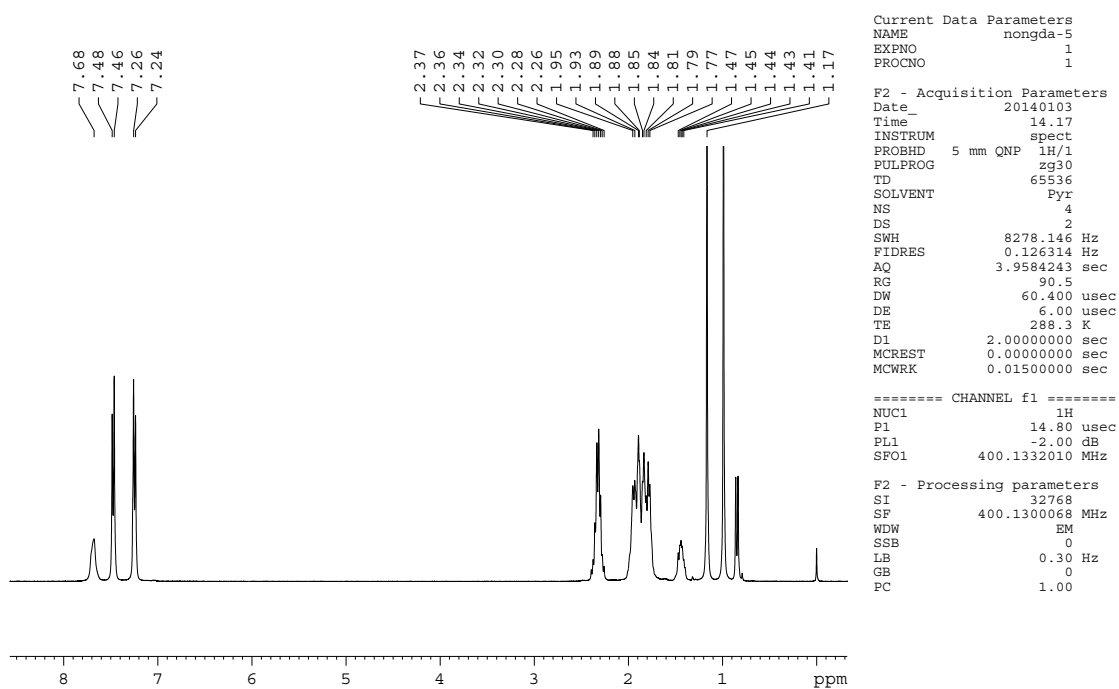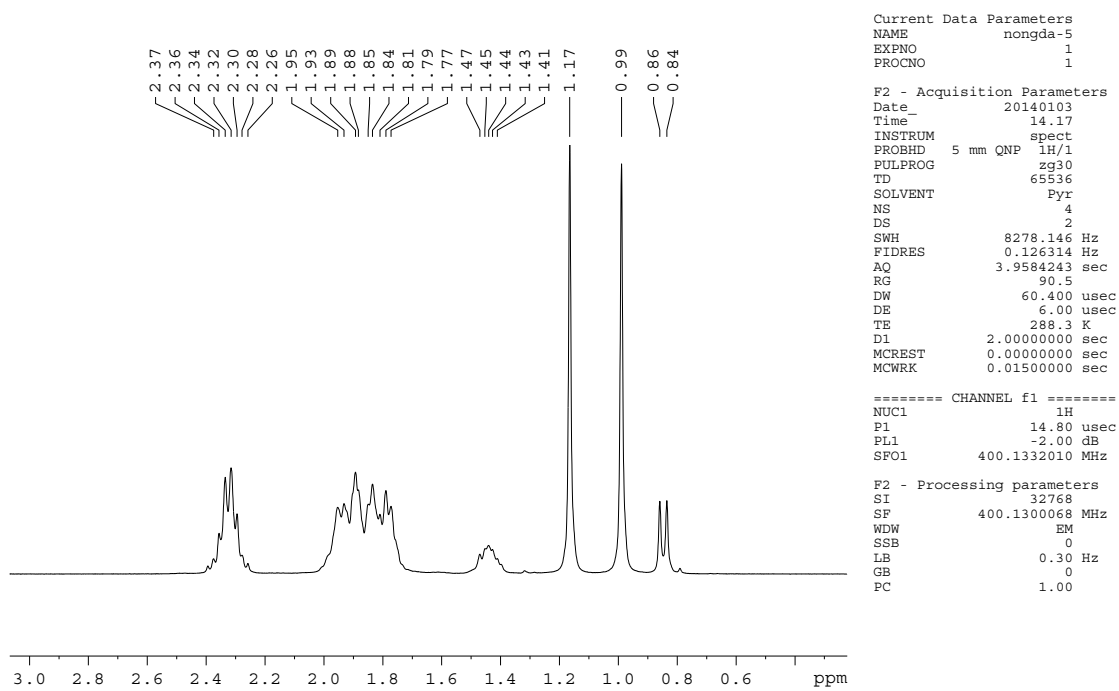



<sup>13</sup>C NMR of compound 8e:

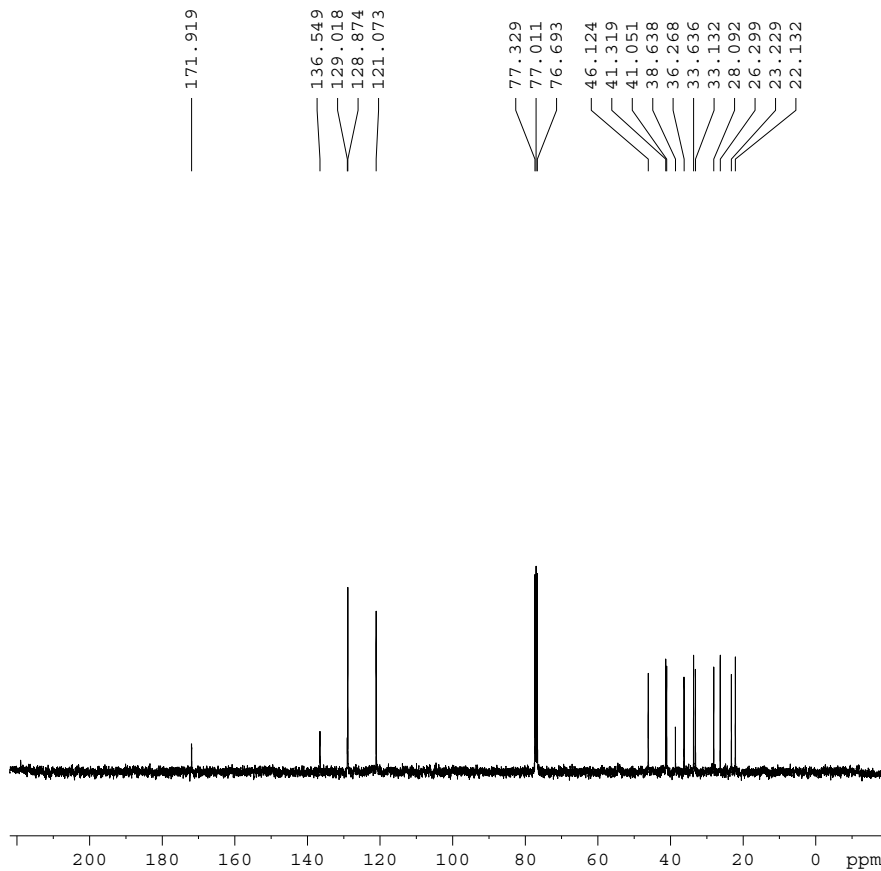

```
Current Data Parameters
NAME      nongda-5
EXPNO    2
PROCNO   1

F2 - Acquisition Parameters
Date      20140103
Time      14.21
INSTRUM  spect
PROBHD   5 mm QNP 1H/1
PULPROG  zgdc30
TD        32768
SOLVENT  Acetone
NS        28
DS        0
SWH       24154.590 Hz
FIDRES    0.737140 Hz
AQ        0.6783476 sec
RG        362
DW        20.700 usec
DE        6.00 usec
TE        289.0 K
D1        1.00000000 sec
d11       0.03000000 sec
MCREST    0.00000000 sec
MCWRK     0.01500000 sec
```

```
===== CHANNEL f1 =====
NUC1      13C
P1        12.00 usec
PL1       -3.00 dB
SFO1      100.6230315 MHz
```

```
===== CHANNEL f2 =====
CPDPRG2   waltz16
NUC2       1H
PCPD2     80.00 usec
PL2        -4.00 dB
PL12       12.12 dB
SFO2       400.1313965 MHz
```

```
F2 - Processing parameters
SI         131072
SF         100.6127756 MHz
WDW        EM
SSB        0
LB         3.00 Hz
GB         0
PC         0.50
```

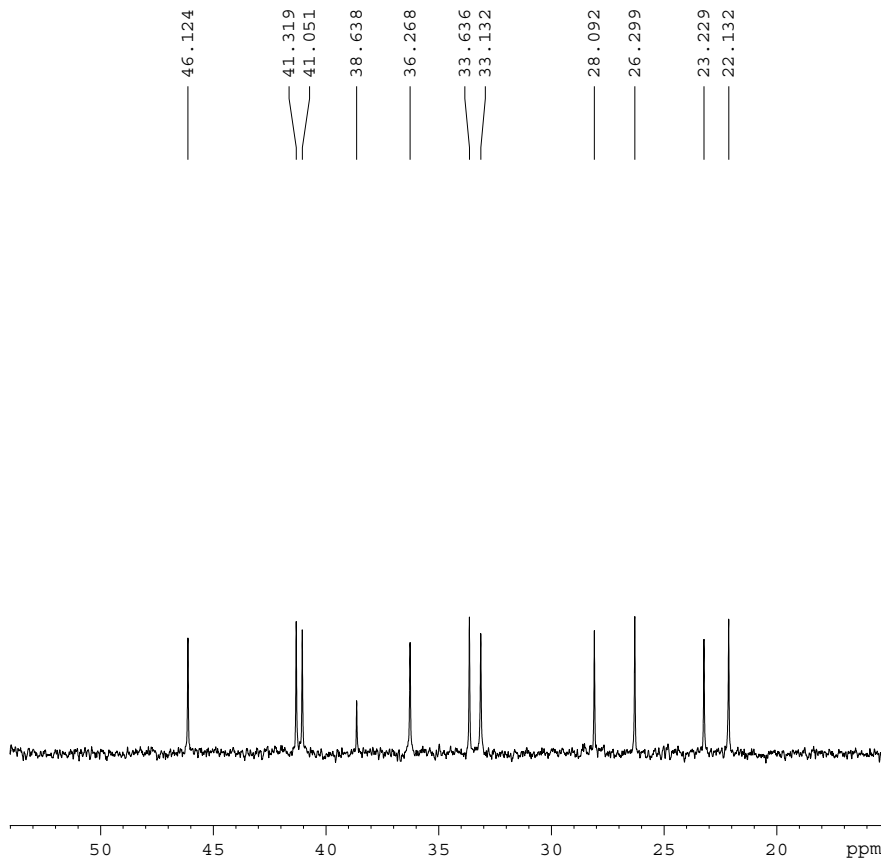

```
Current Data Parameters
NAME      nongda-5
EXPNO    2
PROCNO   1

F2 - Acquisition Parameters
Date      20140103
Time      14.21
INSTRUM  spect
PROBHD   5 mm QNP 1H/1
PULPROG  zgdc30
TD        32768
SOLVENT  Acetone
NS        28
DS        0
SWH       24154.590 Hz
FIDRES    0.737140 Hz
AQ        0.6783476 sec
RG        362
DW        20.700 usec
DE        6.00 usec
TE        289.0 K
D1        1.00000000 sec
d11       0.03000000 sec
MCREST    0.00000000 sec
MCWRK     0.01500000 sec
```

```
===== CHANNEL f1 =====
NUC1      13C
P1        12.00 usec
PL1       -3.00 dB
SFO1      100.6230315 MHz
```

```
===== CHANNEL f2 =====
CPDPRG2   waltz16
NUC2       1H
PCPD2     80.00 usec
PL2        -4.00 dB
PL12       12.12 dB
SFO2       400.1313965 MHz
```

```
F2 - Processing parameters
SI         131072
SF         100.6127756 MHz
WDW        EM
SSB        0
LB         3.00 Hz
GB         0
PC         0.50
```

<sup>1</sup>H NMR of compound 8f:

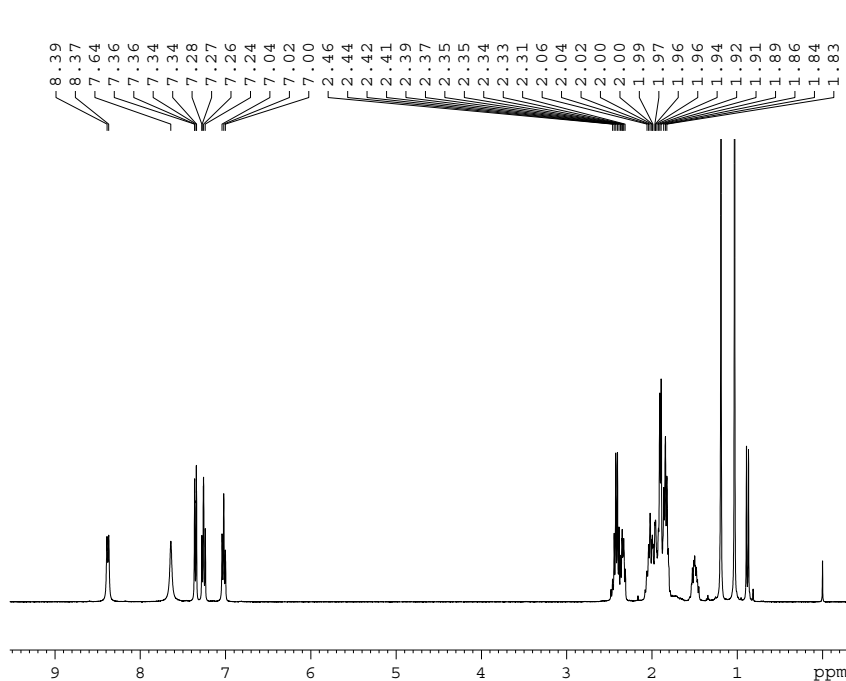

```

Current Data Parameters
NAME          nongda-6
EXPNO        1
PROCNO       1

F2 - Acquisition Parameters
Date_        20140103
Time         21.18
INSTRUM     spect
PROBHD      5 mm QNP 1H/1
PULPROG     zg30
TD          65536
SOLVENT     CDCl3
NS           4
DS           2
SWH         8278.146 Hz
FIDRES     0.126314 Hz
AQ         3.9584243 sec
RG          57
DW         60.400 usec
DE          6.00 usec
TE         296.1 K
D1         2.00000000 sec
MCREST     0.00000000 sec
MCWRK      0.01500000 sec

===== CHANNEL f1 =====
NUC1         1H
P1          14.80 usec
PL1         -2.00 dB
SF01        400.1332010 MHz

F2 - Processing parameters
SI          32768
SF         400.1300085 MHz
WDW         EM
SSB         0
LB         0.30 Hz
GB         0
PC         1.00
    
```

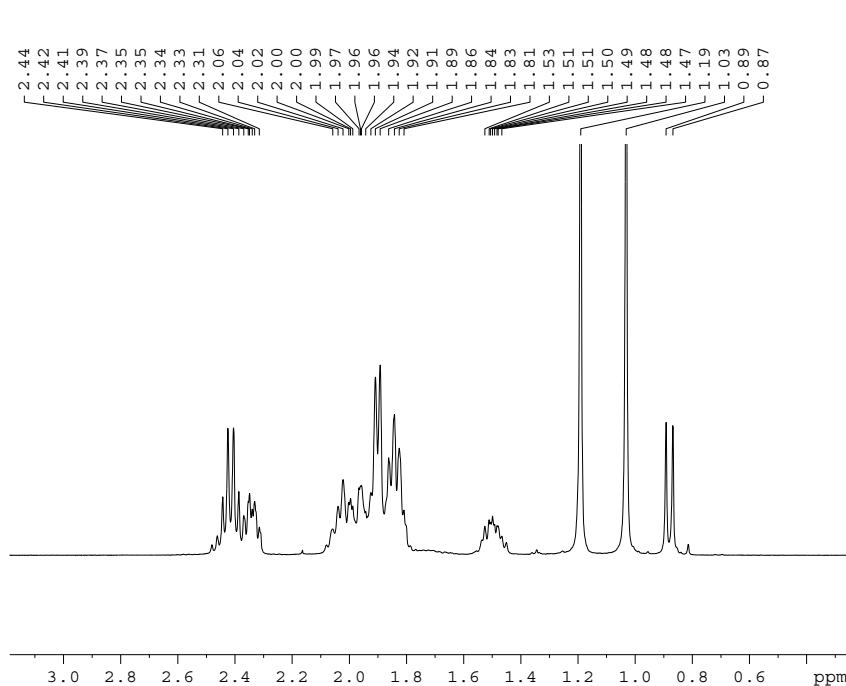

```

Current Data Parameters
NAME          nongda-6
EXPNO        1
PROCNO       1

F2 - Acquisition Parameters
Date_        20140103
Time         21.18
INSTRUM     spect
PROBHD      5 mm QNP 1H/1
PULPROG     zg30
TD          65536
SOLVENT     CDCl3
NS           4
DS           2
SWH         8278.146 Hz
FIDRES     0.126314 Hz
AQ         3.9584243 sec
RG          57
DW         60.400 usec
DE          6.00 usec
TE         296.1 K
D1         2.00000000 sec
MCREST     0.00000000 sec
MCWRK      0.01500000 sec

===== CHANNEL f1 =====
NUC1         1H
P1          14.80 usec
PL1         -2.00 dB
SF01        400.1332010 MHz

F2 - Processing parameters
SI          32768
SF         400.1300085 MHz
WDW         EM
SSB         0
LB         0.30 Hz
GB         0
PC         1.00
    
```

<sup>13</sup>C NMR of compound 8f:

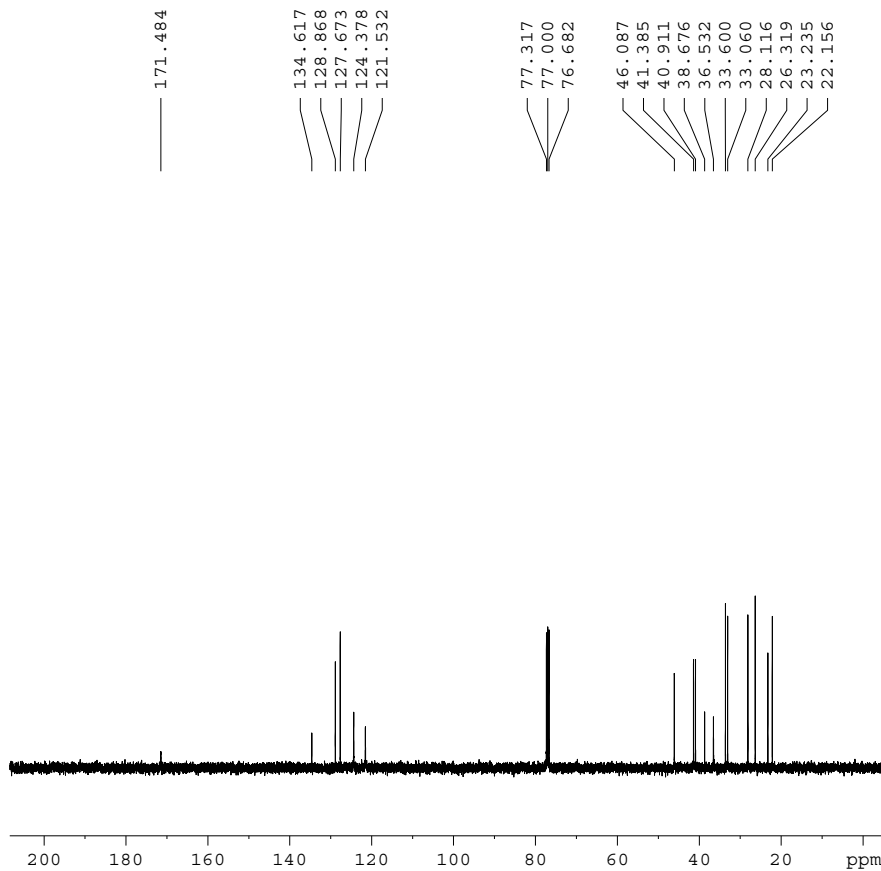

```

Current Data Parameters
NAME      nongda-6
EXPNO    2
PROCNO   1

F2 - Acquisition Parameters
Date      20140103
Time     21.19
INSTRUM  spect
PROBHD   5 mm QNP 1H/1
PULPROG  zgdc30
TD        32768
SOLVENT  Acetone
NS        52
DS        0
SWH       24154.590 Hz
FIDRES    0.737140 Hz
AQ        0.6783476 sec
RG        362
DW        20.700 usec
DE        6.00 usec
TE        296.4 K
D1        1.00000000 sec
d11       0.03000000 sec
MCREST    0.00000000 sec
MCWRK     0.01500000 sec

===== CHANNEL f1 =====
NUC1      13C
P1        12.00 usec
PL1       -3.00 dB
SFO1     100.6230315 MHz

===== CHANNEL f2 =====
CPDPRG2  waltz16
NUC2      1H
PCPD2    80.00 usec
PL2       -4.00 dB
PL12     12.12 dB
SFO2     400.1313965 MHz

F2 - Processing parameters
SI        131072
SF        100.6127756 MHz
WDW       EM
SSB       0
LB        1.00 Hz
GB        0
PC        0.50
    
```

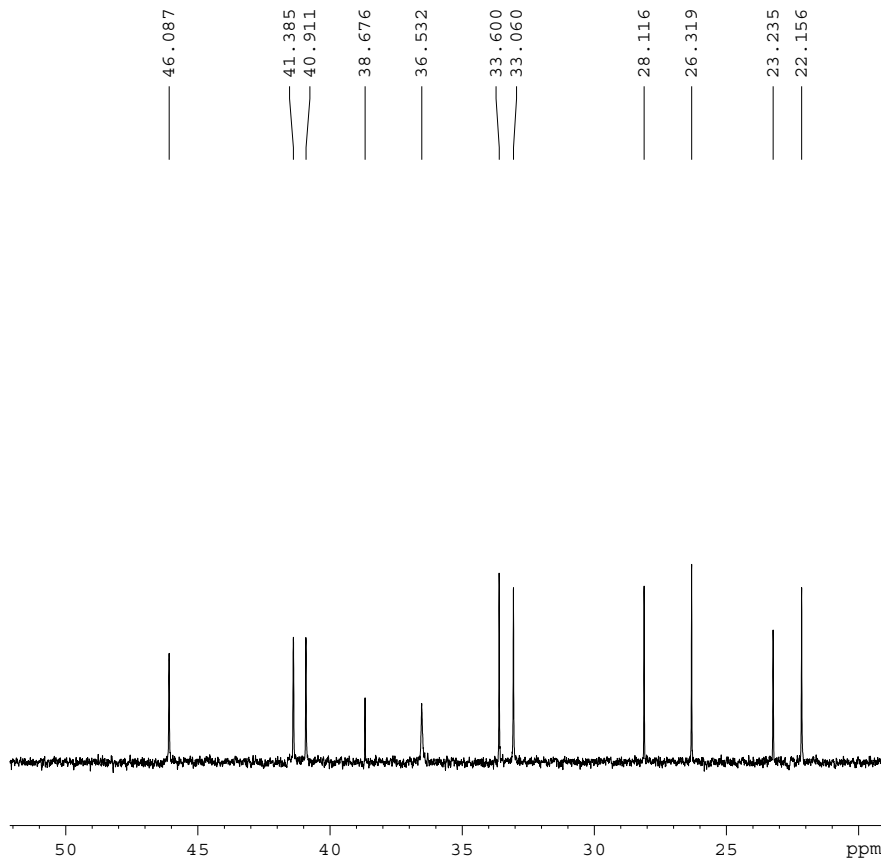

```

Current Data Parameters
NAME      nongda-6
EXPNO    2
PROCNO   1

F2 - Acquisition Parameters
Date      20140103
Time     21.19
INSTRUM  spect
PROBHD   5 mm QNP 1H/1
PULPROG  zgdc30
TD        32768
SOLVENT  Acetone
NS        52
DS        0
SWH       24154.590 Hz
FIDRES    0.737140 Hz
AQ        0.6783476 sec
RG        362
DW        20.700 usec
DE        6.00 usec
TE        296.4 K
D1        1.00000000 sec
d11       0.03000000 sec
MCREST    0.00000000 sec
MCWRK     0.01500000 sec

===== CHANNEL f1 =====
NUC1      13C
P1        12.00 usec
PL1       -3.00 dB
SFO1     100.6230315 MHz

===== CHANNEL f2 =====
CPDPRG2  waltz16
NUC2      1H
PCPD2    80.00 usec
PL2       -4.00 dB
PL12     12.12 dB
SFO2     400.1313965 MHz

F2 - Processing parameters
SI        131072
SF        100.6127756 MHz
WDW       EM
SSB       0
LB        1.00 Hz
GB        0
PC        0.50
    
```

<sup>1</sup>H NMR of compound 8g:

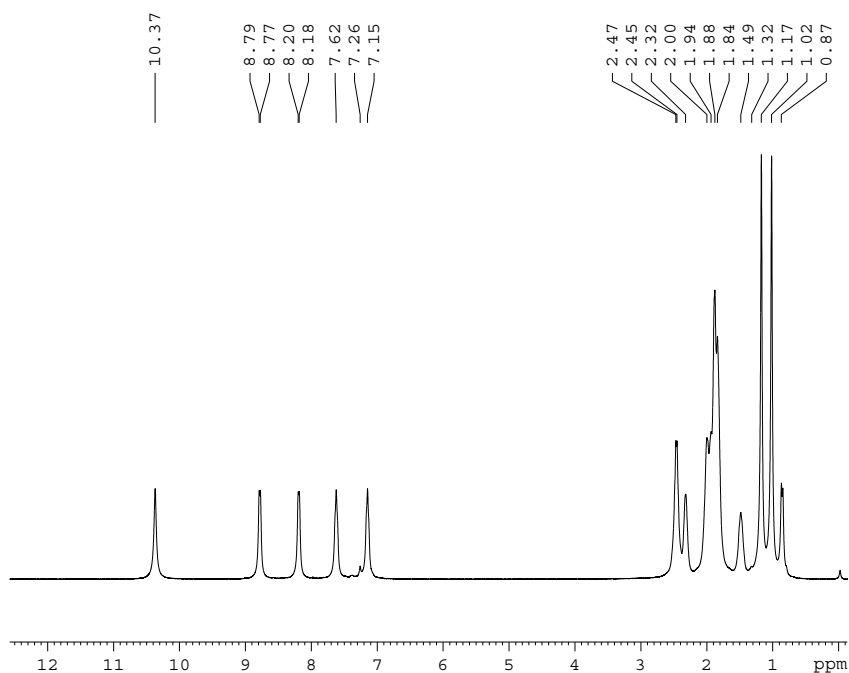

```

Current Data Parameters
NAME          nongda-7
EXPNO         1
PROCNO        1

F2 - Acquisition Parameters
Date_         20140105
Time_         16.41
INSTRUM       spect
PROBHD        5 mm QNP 1H/1
PULPROG       zg30
TD            65536
SOLVENT       CDCl3
NS            4
DS            2
SWH           8278.146 Hz
FIDRES        0.126314 Hz
AQ            3.9584243 sec
RG            50.8
DW            60.400 usec
DE            6.00 usec
TE            288.8 K
D1            2.00000000 sec
MCREST        0.00000000 sec
MCWRK         0.01500000 sec

===== CHANNEL f1 =====
NUC1          1H
P1            14.80 usec
PL1           -2.00 dB
SFO1         400.1332010 MHz

F2 - Processing parameters
SI            32768
SF           400.1300091 MHz
WDW           EM
SSB           0
LB            0.30 Hz
GB            0
PC            1.00
    
```

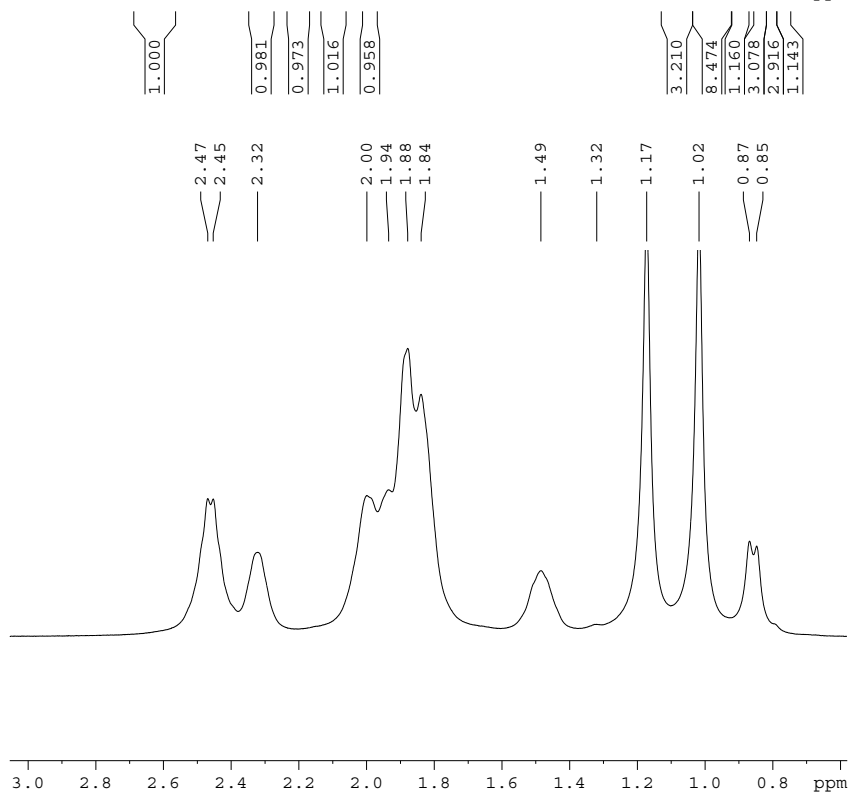

```

Current Data Parameters
NAME          nongda-7
EXPNO         1
PROCNO        1

F2 - Acquisition Parameters
Date_         20140105
Time_         16.41
INSTRUM       spect
PROBHD        5 mm QNP 1H/1
PULPROG       zg30
TD            65536
SOLVENT       CDCl3
NS            4
DS            2
SWH           8278.146 Hz
FIDRES        0.126314 Hz
AQ            3.9584243 sec
RG            50.8
DW            60.400 usec
DE            6.00 usec
TE            288.8 K
D1            2.00000000 sec
MCREST        0.00000000 sec
MCWRK         0.01500000 sec

===== CHANNEL f1 =====
NUC1          1H
P1            14.80 usec
PL1           -2.00 dB
SFO1         400.1332010 MHz

F2 - Processing parameters
SI            32768
SF           400.1300091 MHz
WDW           EM
SSB           0
LB            0.30 Hz
GB            0
PC            1.00
    
```

<sup>13</sup>C NMR of compound 8g:

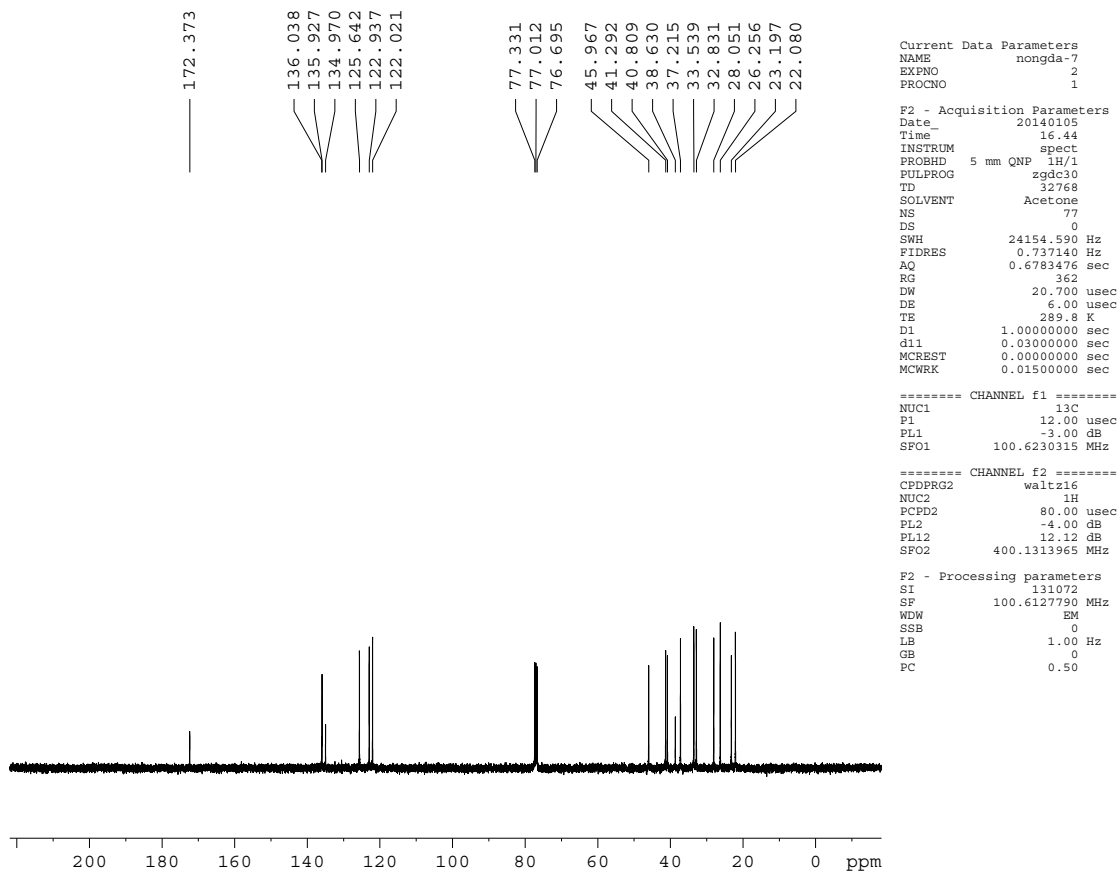

```

Current Data Parameters
NAME      nongda-7
EXPNO    2
PROCNO    1

F2 - Acquisition Parameters
Date_     20140105
Time      16.44
INSTRUM   spect
PROBHD    5 mm QNP 1H/1
PULPROG   zgdc30
TD         32768
SOLVENT   Acetone
NS         77
DS         0
SWH        24154.590 Hz
FIDRES     0.737140 Hz
AQ         0.6783476 sec
RG         362
DW         20.700 usec
DE         6.00 usec
TE         289.8 K
D1         1.0000000 sec
d11        0.0300000 sec
MCREST    0.0000000 sec
MCWRK     0.0150000 sec
    
```

```

===== CHANNEL f1 =====
NUC1      13C
P1        12.00 usec
PL1       -3.00 dB
SFO1     100.6230315 MHz
    
```

```

===== CHANNEL f2 =====
CPDPRG2   waltz16
NUC2       1H
PCPD2     80.00 usec
PL2        -4.00 dB
PL12       12.12 dB
SFO2     400.1313965 MHz
    
```

```

F2 - Processing parameters
SI         131072
SF        100.6127790 MHz
WDW        EM
SSB         0
LB         1.00 Hz
GB         0
PC         0.50
    
```

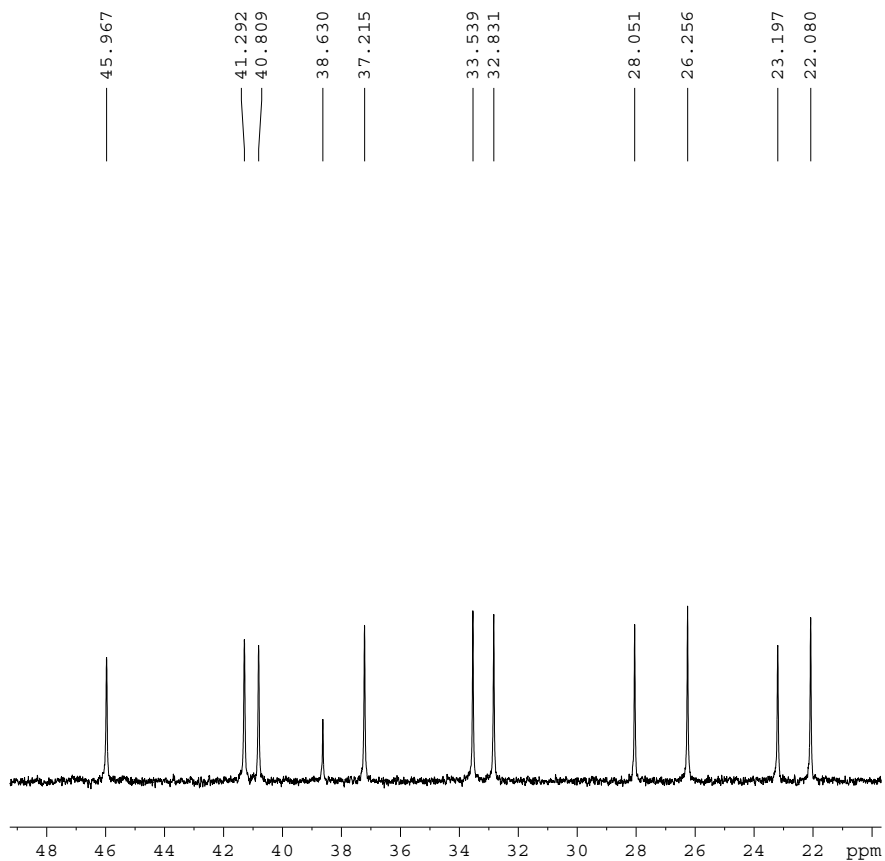

```

Current Data Parameters
NAME      nongda-7
EXPNO    2
PROCNO    1

F2 - Acquisition Parameters
Date_     20140105
Time      16.44
INSTRUM   spect
PROBHD    5 mm QNP 1H/1
PULPROG   zgdc30
TD         32768
SOLVENT   Acetone
NS         77
DS         0
SWH        24154.590 Hz
FIDRES     0.737140 Hz
AQ         0.6783476 sec
RG         362
DW         20.700 usec
DE         6.00 usec
TE         289.8 K
D1         1.0000000 sec
d11        0.0300000 sec
MCREST    0.0000000 sec
MCWRK     0.0150000 sec
    
```

```

===== CHANNEL f1 =====
NUC1      13C
P1        12.00 usec
PL1       -3.00 dB
SFO1     100.6230315 MHz
    
```

```

===== CHANNEL f2 =====
CPDPRG2   waltz16
NUC2       1H
PCPD2     80.00 usec
PL2        -4.00 dB
PL12       12.12 dB
SFO2     400.1313965 MHz
    
```

```

F2 - Processing parameters
SI         131072
SF        100.6127790 MHz
WDW        EM
SSB         0
LB         1.00 Hz
GB         0
PC         0.50
    
```

## GC-MS spectrums of Compound 8a-8g

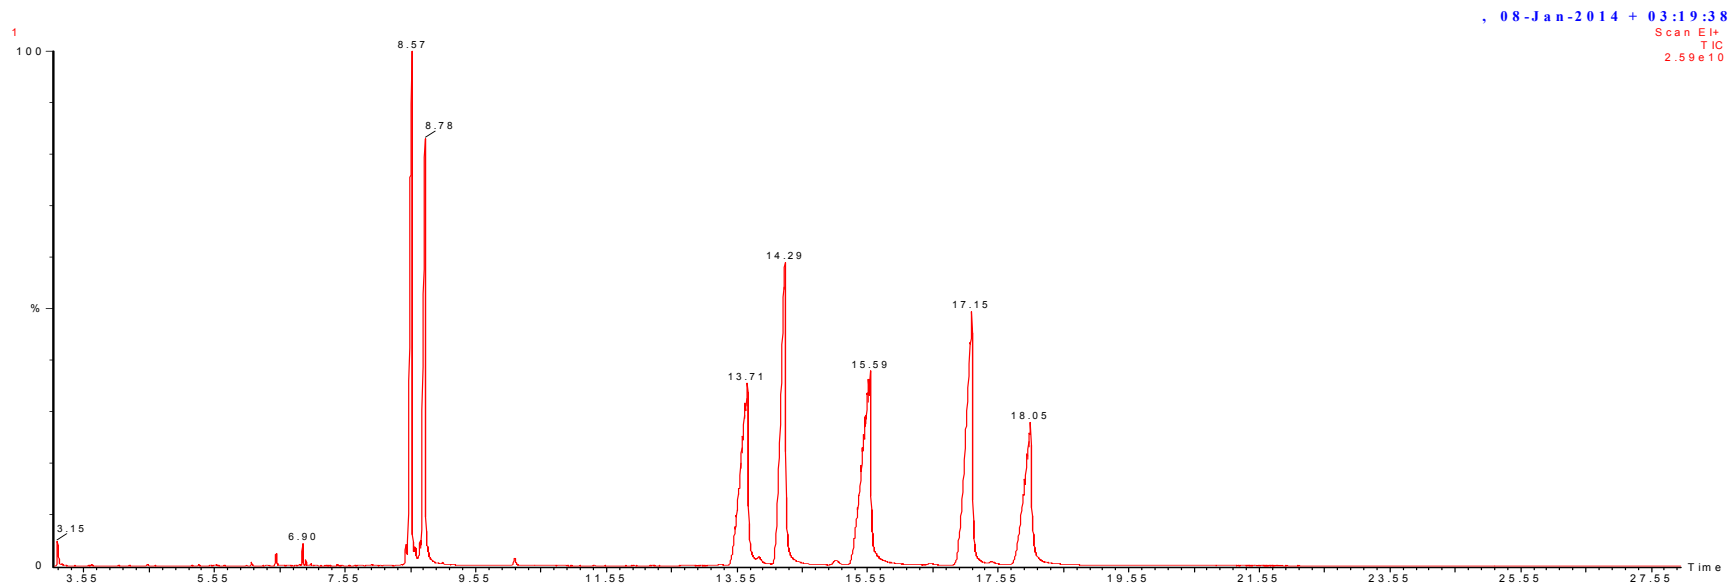

retention time of compounds:

Compound 8a: 8.57 min

Compound 8b: 8.78 min

Compound 8c: 13.71 min

Compound 8d: 15.59 min

Compound 8e: 14.29 min

Compound 8f: 18.05 min

Compound 8g: 17.15 min

# Compound 8a

, 08-Jan-2014 + 03:19:38  
Scan E1+  
1.32e9

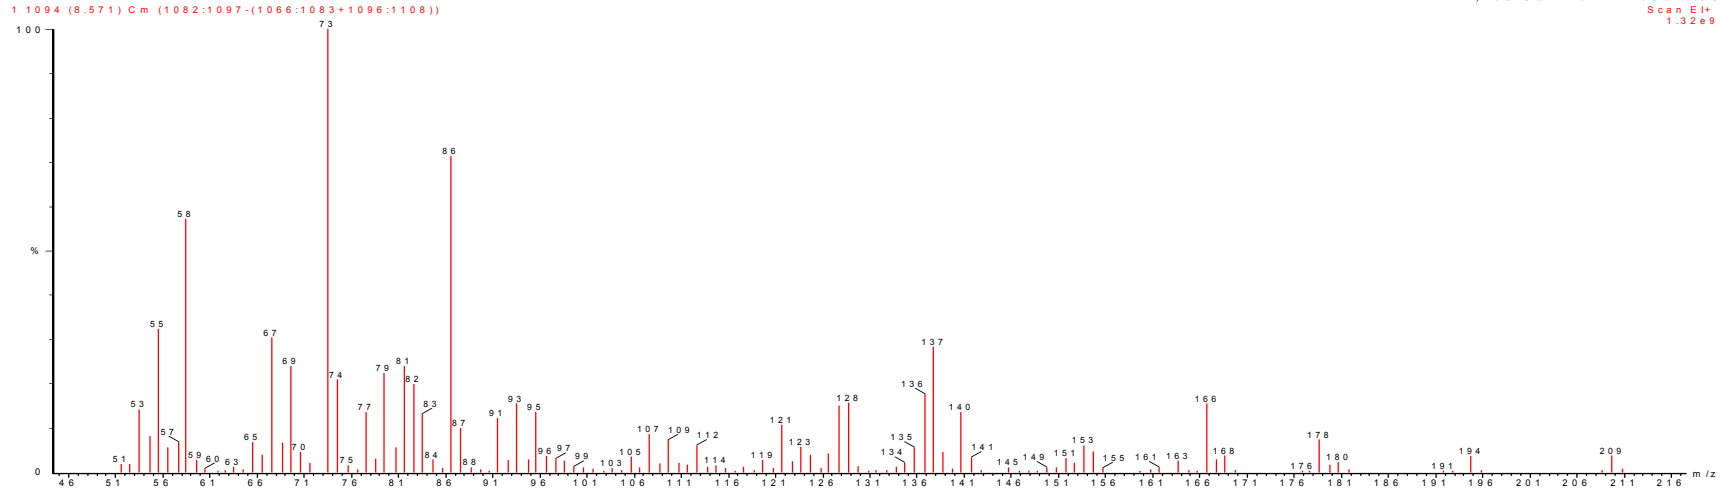

1 1094 (8.571) C m (1082:1097-(1066:1083+1096:1108))

| No. Mass | Inten | % BPI  | % TIC  | No. Mass | Inten | % BPI | % TIC  | No. Mass | Inten | % BPI | % TIC | No. Mass | Inten | % BPI | % TIC | No. Mass | Inten  | % BPI | % TIC |
|----------|-------|--------|--------|----------|-------|-------|--------|----------|-------|-------|-------|----------|-------|-------|-------|----------|--------|-------|-------|
| 1        | 51    | 2.24e7 | 1.76   | 0.21     | 47    | 98    | 3.12e7 | 2.36     | 0.29  | 93    | 146   | 2.61e6   | 0.20  | 0.02  | 189   | 17       | 3.69e7 | 2.78  | 0.34  |
| 2        | 52    | 2.24e7 | 1.69   | 0.21     | 48    | 99    | 1.42e7 | 1.07     | 0.13  | 94    | 147   | 1.46e6   | 0.11  | 0.01  | 190   | 18       | 4.87e7 | 3.68  | 0.45  |
| 3        | 53    | 1.85e8 | 13.96  | 1.71     | 49    | 100   | 1.19e7 | 0.89     | 0.11  | 95    | 148   | 1.83e6   | 0.14  | 0.02  | 191   | 19       | 1.35e7 | 1.03  | 0.13  |
| 4        | 54    | 1.05e8 | 7.93   | 0.97     | 50    | 101   | 8.33e6 | 0.63     | 0.08  | 96    | 149   | 1.12e7   | 0.85  | 0.10  | 192   | 20       | 6.53e7 | 7.20  | 0.88  |
| 5        | 55    | 4.26e8 | 32.16  | 3.93     | 51    | 102   | 2.07e6 | 0.16     | 0.02  | 97    | 150   | 1.29e7   | 0.97  | 0.12  | 193   | 21       | 1.92e7 | 1.45  | 0.18  |
| 6        | 56    | 7.19e7 | 5.43   | 0.66     | 52    | 103   | 9.18e6 | 0.69     | 0.08  | 98    | 151   | 3.91e7   | 2.95  | 0.36  | 194   | 22       | 4.96e7 | 3.52  | 0.43  |
| 7        | 57    | 8.69e7 | 6.56   | 0.80     | 53    | 104   | 4.12e6 | 0.31     | 0.04  | 99    | 152   | 2.56e7   | 1.93  | 0.24  | 195   | 23       | 1.27e7 | 0.95  | 0.12  |
| 8        | 58    | 7.55e8 | 57.07  | 6.98     | 54    | 105   | 4.40e7 | 3.32     | 0.41  | 100   | 153   | 7.72e7   | 5.83  | 0.71  | 196   | 24       | 1.75e8 | 13.21 | 1.59  |
| 9        | 59    | 3.41e7 | 2.59   | 0.32     | 55    | 106   | 1.12e7 | 0.84     | 0.10  | 101   | 154   | 5.89e7   | 4.45  | 0.54  | 197   | 25       | 1.27e7 | 0.95  | 0.12  |
| 10       | 60    | 8.71e6 | 0.66   | 0.08     | 56    | 107   | 1.11e8 | 8.40     | 1.03  | 102   | 155   | 1.07e7   | 0.81  | 0.10  | 198   | 26       | 6.96e6 | 0.53  | 0.06  |
| 11       | 61    | 2.93e6 | 0.19   | 0.02     | 57    | 108   | 2.41e7 | 1.82     | 0.22  | 103   | 156   | 1.82e6   | 0.14  | 0.02  | 199   | 27       | 1.01e7 | 0.76  | 0.09  |
| 12       | 62    | 3.49e6 | 0.26   | 0.03     | 58    | 109   | 9.28e7 | 7.01     | 0.86  | 104   | 160   | 6.96e6   | 0.53  | 0.06  | 200   | 28       | 1.39e8 | 10.54 | 1.29  |
| 13       | 63    | 1.41e7 | 1.07   | 0.13     | 59    | 110   | 2.69e7 | 2.03     | 0.25  | 105   | 161   | 1.12e7   | 0.85  | 0.10  | 201   | 29       | 1.92e7 | 1.45  | 0.18  |
| 14       | 64    | 5.10e6 | 0.39   | 0.05     | 60    | 111   | 1.93e7 | 1.46     | 0.18  | 106   | 163   | 3.10e7   | 2.34  | 0.29  | 202   | 30       | 4.96e7 | 3.52  | 0.43  |
| 15       | 65    | 8.84e7 | 6.68   | 0.82     | 61    | 112   | 7.74e7 | 5.85     | 0.72  | 107   | 164   | 4.94e6   | 0.37  | 0.05  | 203   | 31       | 1.27e7 | 0.95  | 0.12  |
| 16       | 66    | 4.82e7 | 3.71   | 0.45     | 62    | 113   | 1.48e7 | 1.12     | 0.14  | 108   | 165   | 2.38e6   | 0.18  | 0.02  | 204   | 32       | 6.21e6 | 0.47  | 0.06  |
| 17       | 67    | 4.01e8 | 30.29  | 3.71     | 63    | 114   | 1.78e7 | 1.35     | 0.16  | 109   | 166   | 2.04e8   | 15.40 | 1.88  | 205   | 33       | 1.27e7 | 0.95  | 0.12  |
| 18       | 68    | 8.61e7 | 6.50   | 0.80     | 64    | 115   | 9.74e6 | 0.74     | 0.09  | 110   | 167   | 3.69e7   | 2.78  | 0.34  | 206   | 34       | 1.39e8 | 10.54 | 1.29  |
| 19       | 69    | 3.16e8 | 23.85  | 2.92     | 65    | 116   | 2.57e6 | 0.19     | 0.02  | 111   | 168   | 4.87e7   | 3.68  | 0.45  | 207   | 35       | 1.35e7 | 1.03  | 0.13  |
| 20       | 70    | 5.85e7 | 4.42   | 0.54     | 66    | 117   | 1.35e7 | 1.03     | 0.13  | 112   | 169   | 4.83e6   | 0.36  | 0.04  | 208   | 36       | 1.92e7 | 1.45  | 0.18  |
| 21       | 71    | 2.60e7 | 1.97   | 0.24     | 67    | 118   | 4.22e6 | 0.32     | 0.04  | 113   | 176   | 2.90e6   | 0.22  | 0.03  | 209   | 37       | 1.27e7 | 0.95  | 0.12  |
| 22       | 73    | 1.32e9 | 100.00 | 12.23    | 68    | 119   | 3.35e7 | 2.53     | 0.31  | 114   | 177   | 2.33e6   | 0.18  | 0.02  | 210   | 38       | 1.27e7 | 0.95  | 0.12  |
| 23       | 74    | 2.75e8 | 20.79  | 2.34     | 69    | 120   | 1.01e7 | 0.76     | 0.09  | 115   | 178   | 1.01e7   | 0.76  | 0.09  | 211   | 39       | 1.27e7 | 0.95  | 0.12  |
| 24       | 75    | 1.80e7 | 1.36   | 0.17     | 70    | 121   | 1.39e8 | 10.54    | 1.29  | 116   | 179   | 1.92e7   | 1.45  | 0.18  | 212   | 40       | 4.66e7 | 3.52  | 0.43  |
| 25       | 76    | 6.13e6 | 0.46   | 0.06     | 71    | 122   | 3.06e7 | 2.31     | 0.28  | 117   | 180   | 2.74e7   | 2.07  | 0.25  | 213   | 41       | 1.27e7 | 0.95  | 0.12  |
| 26       | 77    | 1.77e8 | 13.33  | 1.63     | 72    | 123   | 7.31e7 | 5.52     | 0.68  | 118   | 181   | 6.21e6   | 0.47  | 0.06  | 214   | 42       | 1.27e7 | 0.95  | 0.12  |
| 27       | 78    | 3.74e7 | 2.82   | 0.35     | 73    | 124   | 4.96e7 | 3.75     | 0.46  | 119   | 181   | 2.75e6   | 0.21  | 0.03  | 215   | 43       | 1.27e7 | 0.95  | 0.12  |
| 28       | 79    | 2.94e8 | 22.24  | 2.72     | 74    | 125   | 1.01e7 | 0.76     | 0.09  | 120   | 192   | 2.57e6   | 0.19  | 0.02  | 216   | 44       | 4.66e7 | 3.52  | 0.43  |
| 29       | 80    | 7.24e7 | 5.47   | 0.67     | 75    | 126   | 5.47e7 | 4.13     | 0.51  | 121   | 194   | 4.66e7   | 3.52  | 0.43  | 217   | 45       | 1.27e7 | 0.95  | 0.12  |
| 30       | 81    | 3.14e8 | 23.75  | 2.91     | 76    | 127   | 1.98e8 | 14.92    | 1.63  | 122   | 195   | 4.63e6   | 0.35  | 0.04  | 218   | 46       | 1.27e7 | 0.95  | 0.12  |
| 31       | 82    | 2.60e8 | 19.67  | 2.41     | 77    | 128   | 2.05e8 | 15.51    | 1.90  | 123   | 208   | 4.40e6   | 0.33  | 0.04  | 219   | 47       | 1.27e7 | 0.95  | 0.12  |
| 32       | 83    | 1.72e8 | 13.02  | 1.59     | 78    | 129   | 1.51e7 | 1.14     | 0.14  | 124   | 209   | 4.74e7   | 3.58  | 0.44  | 220   | 48       | 1.27e7 | 0.95  | 0.12  |
| 33       | 84    | 3.60e7 | 2.72   | 0.33     | 79    | 130   | 2.69e6 | 0.20     | 0.02  | 125   | 210   | 7.22e6   | 0.55  | 0.07  | 221   | 49       | 1.27e7 | 0.95  | 0.12  |
| 34       | 85    | 9.00e6 | 0.68   | 0.08     | 80    | 131   | 4.71e6 | 0.36     | 0.04  | 222   | 211   | 1.27e7   | 0.95  | 0.12  | 223   | 50       | 1.27e7 | 0.95  | 0.12  |
| 35       | 86    | 9.42e8 | 71.16  | 8.70     | 81    | 132   | 3.19e6 | 0.24     | 0.03  | 224   | 212   | 1.27e7   | 0.95  | 0.12  | 225   | 51       | 1.27e7 | 0.95  | 0.12  |
| 36       | 87    | 1.30e8 | 9.83   | 1.20     | 82    | 133   | 1.39e7 | 1.05     | 0.13  | 226   | 213   | 1.27e7   | 0.95  | 0.12  | 227   | 52       | 1.27e7 | 0.95  | 0.12  |
| 37       | 88    | 1.16e7 | 0.88   | 0.11     | 83    | 134   | 2.64e7 | 2.00     | 0.24  | 228   | 214   | 1.27e7   | 0.95  | 0.12  | 229   | 53       | 1.27e7 | 0.95  | 0.12  |
| 38       | 89    | 6.26e6 | 0.47   | 0.06     | 84    | 135   | 7.24e7 | 5.47     | 0.67  | 230   | 215   | 1.27e7   | 0.95  | 0.12  | 231   | 54       | 1.27e7 | 0.95  | 0.12  |
| 39       | 90    | 2.87e6 | 0.22   | 0.03     | 85    | 136   | 2.31e8 | 17.43    | 2.13  | 232   | 216   | 1.27e7   | 0.95  | 0.12  | 233   | 55       | 1.27e7 | 0.95  | 0.12  |
| 40       | 91    | 1.59e8 | 12.02  | 1.47     | 86    | 137   | 3.73e8 | 28.21    | 3.45  | 234   | 217   | 1.27e7   | 0.95  | 0.12  | 235   | 56       | 1.27e7 | 0.95  | 0.12  |
| 41       | 92    | 3.35e7 | 2.53   | 0.31     | 87    | 138   | 5.79e7 | 4.38     | 0.54  | 236   | 218   | 1.27e7   | 0.95  | 0.12  | 237   | 57       | 1.27e7 | 0.95  | 0.12  |
| 42       | 93    | 2.04e8 | 15.43  | 1.69     | 88    | 139   | 8.15e6 | 0.62     | 0.08  | 238   | 219   | 1.27e7   | 0.95  | 0.12  | 239   | 58       | 1.27e7 | 0.95  | 0.12  |
| 43       | 94    | 3.62e7 | 2.73   | 0.33     | 89    | 140   | 1.78e8 | 13.41    | 1.64  | 240   | 220   | 1.27e7   | 0.95  | 0.12  | 241   | 59       | 1.27e7 | 0.95  | 0.12  |
| 44       | 95    | 1.77e8 | 13.36  | 1.63     | 90    | 141   | 4.09e7 | 3.09     | 0.38  | 242   | 221   | 1.27e7   | 0.95  | 0.12  | 243   | 60       | 1.27e7 | 0.95  | 0.12  |
| 45       | 96    | 4.63e7 | 3.50   | 0.43     | 91    | 142   | 4.53e6 | 0.34     | 0.04  | 244   | 222   | 1.27e7   | 0.95  | 0.12  | 245   | 61       | 1.27e7 | 0.95  | 0.12  |
| 46       | 97    | 3.84e7 | 2.90   | 0.36     | 92    | 145   | 1.16e7 | 0.87     | 0.11  | 246   | 223   | 1.27e7   | 0.95  | 0.12  | 247   | 62       | 1.27e7 | 0.95  | 0.12  |

# Compound 8b

08-Jan-2014 + 03:19:38  
Scan E1+  
1.58e9

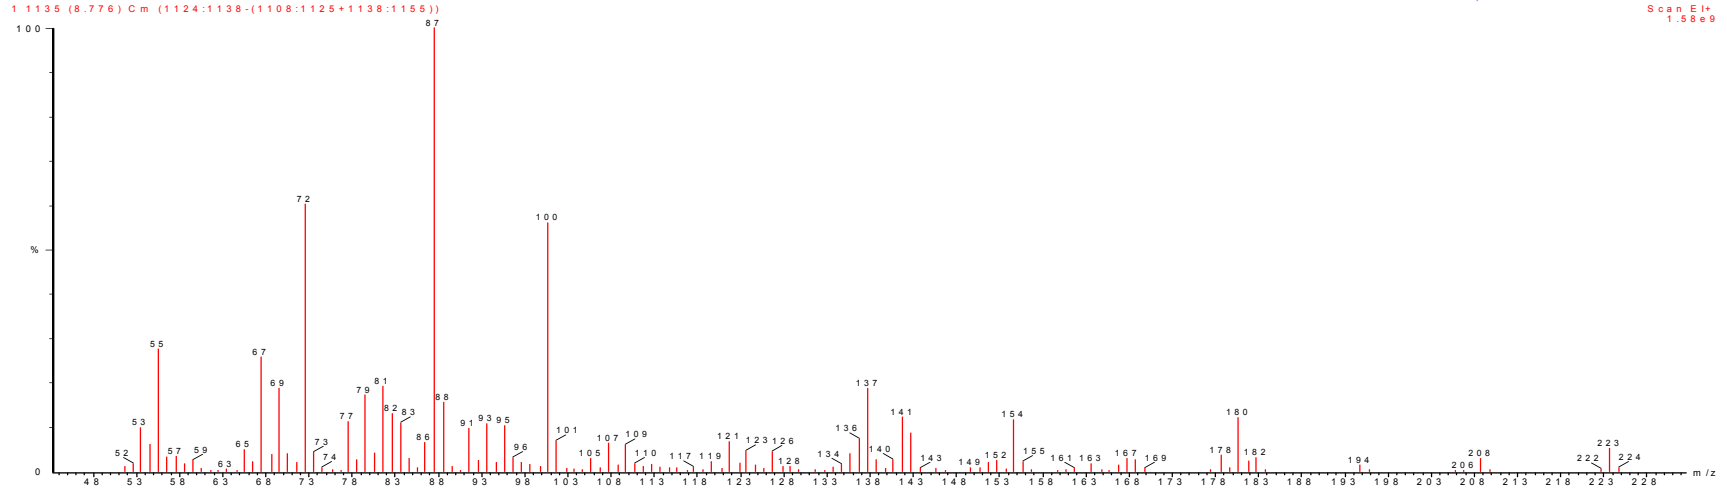

1 1135 (8.776) C m (1124:1138-(1108:1125+1138:1155))

| No | Mass | Inten  | % BPI  | % TIC | No | Mass | Inten  | % BPI | % TIC | No  | Mass | Inten  | % BPI | % TIC | No | Mass | Inten | % BPI | % TIC | No | Mass | Inten | % BPI | % TIC |
|----|------|--------|--------|-------|----|------|--------|-------|-------|-----|------|--------|-------|-------|----|------|-------|-------|-------|----|------|-------|-------|-------|
| 1  | 51   | 1.78e7 | 1.13   | 0.17  | 47 | 97   | 3.15e7 | 1.99  | 0.30  | 93  | 146  | 9.34e6 | 0.59  | 0.09  |    |      |       |       |       |    |      |       |       |       |
| 2  | 52   | 2.52e7 | 1.60   | 0.24  | 48 | 98   | 2.33e7 | 1.48  | 0.22  | 94  | 146  | 1.93e6 | 0.12  | 0.02  |    |      |       |       |       |    |      |       |       |       |
| 3  | 53   | 1.54e8 | 9.74   | 1.45  | 49 | 99   | 1.56e7 | 0.99  | 0.15  | 95  | 146  | 1.29e7 | 0.81  | 0.12  |    |      |       |       |       |    |      |       |       |       |
| 4  | 54   | 9.62e7 | 6.09   | 0.91  | 50 | 100  | 8.95e8 | 86.07 | 8.34  | 96  | 150  | 1.19e7 | 0.76  | 0.11  |    |      |       |       |       |    |      |       |       |       |
| 5  | 55   | 4.34e8 | 27.51  | 4.09  | 51 | 101  | 1.08e8 | 684   | 1.02  | 97  | 151  | 3.02e7 | 1.91  | 0.28  |    |      |       |       |       |    |      |       |       |       |
| 6  | 56   | 6.03e7 | 3.19   | 0.47  | 52 | 102  | 1.05e7 | 0.66  | 0.10  | 98  | 152  | 3.85e7 | 2.44  | 0.36  |    |      |       |       |       |    |      |       |       |       |
| 7  | 57   | 5.12e7 | 3.24   | 0.48  | 53 | 103  | 7.33e6 | 0.46  | 0.07  | 99  | 153  | 7.99e6 | 0.51  | 0.08  |    |      |       |       |       |    |      |       |       |       |
| 8  | 58   | 2.57e7 | 1.62   | 0.24  | 54 | 104  | 3.89e6 | 0.25  | 0.04  | 100 | 154  | 1.32e8 | 11.54 | 1.72  |    |      |       |       |       |    |      |       |       |       |
| 9  | 59   | 3.88e7 | 2.46   | 0.37  | 55 | 105  | 4.51e7 | 2.86  | 0.43  | 101 | 155  | 3.40e7 | 2.15  | 0.32  |    |      |       |       |       |    |      |       |       |       |
| 10 | 60   | 1.35e6 | 0.89   | 0.13  | 56 | 106  | 1.27e7 | 0.81  | 0.12  | 102 | 156  | 4.77e6 | 0.30  | 0.04  |    |      |       |       |       |    |      |       |       |       |
| 11 | 61   | 2.02e6 | 0.13   | 0.02  | 57 | 107  | 9.88e7 | 6.26  | 0.93  | 103 | 159  | 2.55e6 | 0.16  | 0.02  |    |      |       |       |       |    |      |       |       |       |
| 12 | 62   | 1.81e6 | 0.11   | 0.02  | 58 | 108  | 2.19e7 | 1.38  | 0.21  | 104 | 160  | 4.28e6 | 0.27  | 0.04  |    |      |       |       |       |    |      |       |       |       |
| 13 | 63   | 6.72e6 | 0.43   | 0.06  | 59 | 109  | 9.30e7 | 5.89  | 0.88  | 105 | 161  | 1.01e7 | 0.64  | 0.10  |    |      |       |       |       |    |      |       |       |       |
| 14 | 64   | 3.41e6 | 0.22   | 0.03  | 60 | 110  | 2.52e7 | 1.60  | 0.24  | 106 | 163  | 2.71e7 | 1.72  | 0.26  |    |      |       |       |       |    |      |       |       |       |
| 15 | 65   | 7.59e7 | 4.81   | 0.72  | 61 | 111  | 1.60e7 | 1.02  | 0.15  | 107 | 164  | 3.94e6 | 0.25  | 0.04  |    |      |       |       |       |    |      |       |       |       |
| 16 | 66   | 3.35e7 | 2.12   | 0.32  | 62 | 112  | 2.43e7 | 1.54  | 0.23  | 108 | 165  | 2.42e6 | 0.15  | 0.02  |    |      |       |       |       |    |      |       |       |       |
| 17 | 67   | 4.07e8 | 25.76  | 3.83  | 63 | 113  | 1.33e7 | 0.84  | 0.13  | 109 | 166  | 2.11e7 | 1.34  | 0.20  |    |      |       |       |       |    |      |       |       |       |
| 18 | 68   | 5.89e7 | 3.73   | 0.56  | 64 | 114  | 1.37e7 | 0.74  | 0.11  | 110 | 167  | 4.33e7 | 2.87  | 0.43  |    |      |       |       |       |    |      |       |       |       |
| 19 | 69   | 2.94e8 | 18.63  | 2.77  | 65 | 115  | 1.30e7 | 0.83  | 0.12  | 111 | 168  | 3.97e7 | 2.51  | 0.37  |    |      |       |       |       |    |      |       |       |       |
| 20 | 70   | 6.19e7 | 3.92   | 0.58  | 66 | 116  | 1.95e6 | 0.12  | 0.02  | 112 | 169  | 8.98e6 | 0.57  | 0.08  |    |      |       |       |       |    |      |       |       |       |
| 21 | 71   | 3.16e7 | 2.00   | 0.30  | 67 | 117  | 1.51e7 | 0.96  | 0.14  | 113 | 177  | 4.59e6 | 0.29  | 0.04  |    |      |       |       |       |    |      |       |       |       |
| 22 | 72   | 9.05e8 | 60.18  | 8.96  | 68 | 118  | 4.76e6 | 0.30  | 0.04  | 114 | 178  | 5.79e7 | 3.67  | 0.55  |    |      |       |       |       |    |      |       |       |       |
| 23 | 73   | 6.83e7 | 4.20   | 0.63  | 69 | 119  | 3.28e7 | 2.08  | 0.31  | 115 | 179  | 1.14e7 | 0.72  | 0.11  |    |      |       |       |       |    |      |       |       |       |
| 24 | 74   | 1.19e7 | 0.75   | 0.11  | 70 | 120  | 8.61e6 | 0.54  | 0.08  | 116 | 180  | 1.89e8 | 12.00 | 1.79  |    |      |       |       |       |    |      |       |       |       |
| 25 | 75   | 3.57e6 | 0.23   | 0.03  | 71 | 121  | 1.04e8 | 6.62  | 0.98  | 117 | 181  | 3.56e7 | 2.26  | 0.34  |    |      |       |       |       |    |      |       |       |       |
| 26 | 76   | 3.11e6 | 0.20   | 0.03  | 72 | 122  | 2.78e7 | 1.76  | 0.26  | 118 | 182  | 4.77e7 | 3.02  | 0.45  |    |      |       |       |       |    |      |       |       |       |
| 27 | 77   | 1.75e6 | 1.11   | 0.16  | 73 | 123  | 7.04e7 | 4.46  | 0.66  | 119 | 183  | 5.94e6 | 0.32  | 0.05  |    |      |       |       |       |    |      |       |       |       |
| 28 | 78   | 3.94e7 | 2.49   | 0.37  | 74 | 124  | 2.24e7 | 1.42  | 0.21  | 120 | 194  | 2.23e7 | 1.41  | 0.21  |    |      |       |       |       |    |      |       |       |       |
| 29 | 79   | 2.71e6 | 1.71   | 0.25  | 75 | 125  | 9.01e6 | 0.57  | 0.08  | 121 | 195  | 5.52e6 | 0.34  | 0.05  |    |      |       |       |       |    |      |       |       |       |
| 30 | 80   | 6.51e7 | 4.12   | 0.61  | 76 | 126  | 6.85e7 | 4.34  | 0.65  | 122 | 205  | 1.51e6 | 0.10  | 0.02  |    |      |       |       |       |    |      |       |       |       |
| 31 | 81   | 3.03e6 | 1.91   | 0.28  | 77 | 127  | 1.61e7 | 1.02  | 0.15  | 123 | 206  | 6.52e6 | 0.41  | 0.06  |    |      |       |       |       |    |      |       |       |       |
| 32 | 82   | 2.05e6 | 1.30   | 0.19  | 78 | 128  | 1.62e7 | 1.03  | 0.15  | 124 | 208  | 4.55e7 | 2.88  | 0.43  |    |      |       |       |       |    |      |       |       |       |
| 33 | 83   | 1.71e6 | 1.04   | 0.15  | 79 | 129  | 4.91e6 | 0.31  | 0.05  | 125 | 209  | 5.77e6 | 0.35  | 0.05  |    |      |       |       |       |    |      |       |       |       |
| 34 | 84   | 4.62e7 | 2.93   | 0.44  | 80 | 131  | 3.74e6 | 0.24  | 0.04  | 126 | 222  | 7.34e6 | 0.47  | 0.07  |    |      |       |       |       |    |      |       |       |       |
| 35 | 85   | 1.25e7 | 0.79   | 0.12  | 81 | 132  | 2.04e6 | 0.13  | 0.02  | 127 | 223  | 8.97e7 | 5.71  | 0.76  |    |      |       |       |       |    |      |       |       |       |
| 36 | 86   | 1.02e6 | 0.65   | 0.09  | 82 | 133  | 1.38e7 | 0.87  | 0.13  | 128 | 224  | 1.20e7 | 0.76  | 0.11  |    |      |       |       |       |    |      |       |       |       |
| 37 | 87   | 1.58e9 | 100.00 | 14.88 | 83 | 134  | 2.06e7 | 1.49  | 0.22  |     |      |        |       |       |    |      |       |       |       |    |      |       |       |       |
| 38 | 88   | 2.44e6 | 1.54   | 0.23  | 84 | 135  | 6.05e6 | 0.37  | 0.05  |     |      |        |       |       |    |      |       |       |       |    |      |       |       |       |
| 39 | 89   | 1.70e7 | 1.08   | 0.16  | 85 | 136  | 1.15e8 | 7.26  | 1.08  |     |      |        |       |       |    |      |       |       |       |    |      |       |       |       |
| 40 | 90   | 3.36e6 | 0.21   | 0.03  | 86 | 137  | 2.95e6 | 1.87  | 0.27  |     |      |        |       |       |    |      |       |       |       |    |      |       |       |       |
| 41 | 91   | 1.53e6 | 0.98   | 0.14  | 87 | 138  | 4.10e7 | 2.60  | 0.39  |     |      |        |       |       |    |      |       |       |       |    |      |       |       |       |
| 42 | 92   | 3.92e7 | 2.48   | 0.37  | 88 | 139  | 3.53e6 | 0.24  | 0.04  |     |      |        |       |       |    |      |       |       |       |    |      |       |       |       |
| 43 | 93   | 1.69e6 | 1.07   | 0.16  | 89 | 140  | 4.11e7 | 2.60  | 0.39  |     |      |        |       |       |    |      |       |       |       |    |      |       |       |       |
| 44 | 94   | 3.14e7 | 1.99   | 0.30  | 90 | 141  | 1.93e8 | 12.25 | 1.82  |     |      |        |       |       |    |      |       |       |       |    |      |       |       |       |
| 45 | 95   | 1.63e6 | 1.03   | 0.15  | 91 | 142  | 1.36e6 | 0.89  | 0.12  |     |      |        |       |       |    |      |       |       |       |    |      |       |       |       |
| 46 | 96   | 4.80e7 | 3.04   | 0.45  | 92 | 143  | 1.07e7 | 0.68  | 0.10  |     |      |        |       |       |    |      |       |       |       |    |      |       |       |       |





# Compound 8d

08-Jan-2014 + 03:19:38  
Scan E1+  
1.15e9

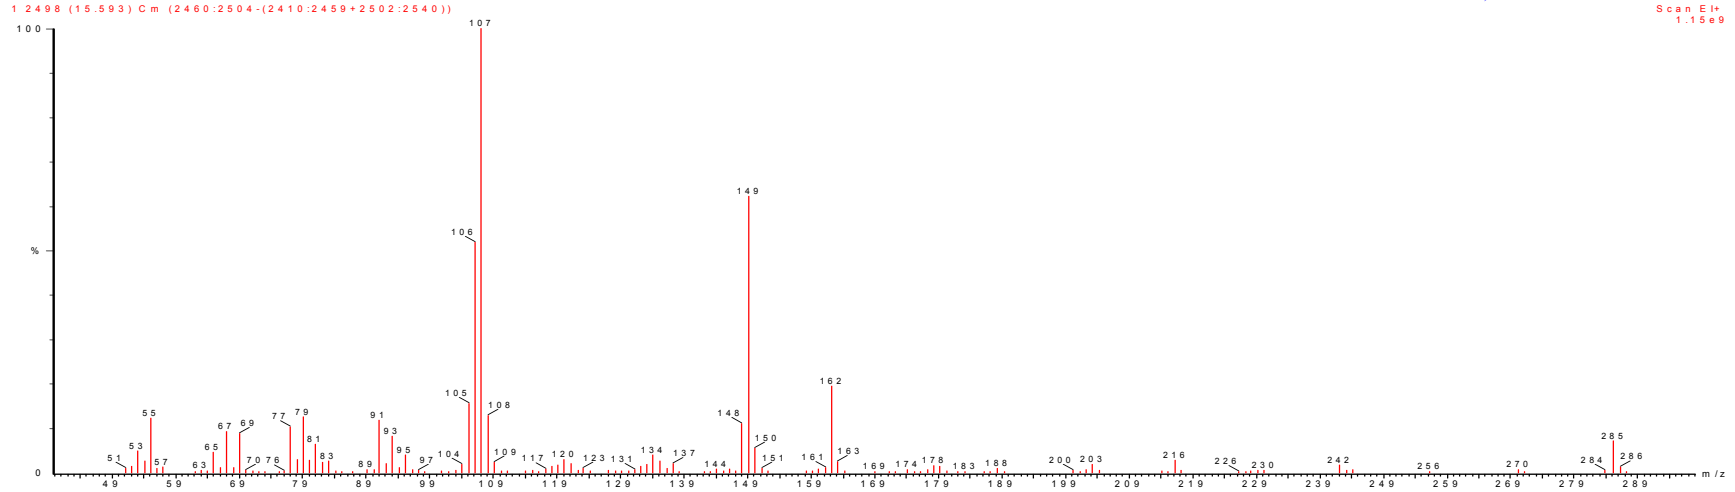

1 2498 (15.593) C m (2460:2504-(2410:2459+2502:2540))

| No | Mass | Inten  | %BPI  | %TIC | No | Mass | Inten  | %BPI   | %TIC  | No  | Mass | Inten  | %BPI | %TIC | No | Mass | Inten | %BPI | %TIC |
|----|------|--------|-------|------|----|------|--------|--------|-------|-----|------|--------|------|------|----|------|-------|------|------|
| 1  | 51   | 1.07e7 | 0.93  | 0.20 | 47 | 106  | 5.96e6 | 51.60  | 11.06 | 93  | 164  | 2.66e6 | 0.23 | 0.05 |    |      |       |      |      |
| 2  | 52   | 1.48e7 | 1.28  | 0.27 | 48 | 107  | 1.15e9 | 100.00 | 21.35 | 94  | 166  | 2.33e6 | 0.20 | 0.04 |    |      |       |      |      |
| 3  | 53   | 5.62e7 | 4.88  | 1.04 | 49 | 108  | 1.47e8 | 12.73  | 2.72  | 95  | 171  | 1.21e6 | 0.11 | 0.02 |    |      |       |      |      |
| 4  | 54   | 2.93e7 | 2.55  | 0.54 | 50 | 109  | 2.59e7 | 2.25   | 0.48  | 96  | 172  | 2.09e6 | 0.18 | 0.04 |    |      |       |      |      |
| 5  | 55   | 1.40e8 | 12.16 | 2.60 | 51 | 110  | 4.16e6 | 0.36   | 0.08  | 97  | 174  | 6.75e6 | 0.59 | 0.13 |    |      |       |      |      |
| 6  | 56   | 9.57e6 | 0.83  | 0.19 | 52 | 111  | 2.87e6 | 0.25   | 0.05  | 98  | 175  | 2.24e6 | 0.19 | 0.04 |    |      |       |      |      |
| 7  | 57   | 1.34e7 | 1.17  | 0.25 | 53 | 114  | 3.04e6 | 0.26   | 0.06  | 99  | 176  | 1.85e6 | 0.16 | 0.03 |    |      |       |      |      |
| 8  | 62   | 1.29e6 | 0.11  | 0.02 | 54 | 115  | 5.97e6 | 0.51   | 0.11  | 100 | 177  | 7.37e6 | 0.64 | 0.14 |    |      |       |      |      |
| 9  | 63   | 5.81e6 | 0.50  | 0.11 | 55 | 116  | 1.81e6 | 0.14   | 0.03  | 101 | 178  | 1.69e7 | 1.47 | 0.31 |    |      |       |      |      |
| 10 | 64   | 3.93e6 | 0.34  | 0.07 | 56 | 117  | 7.98e6 | 0.69   | 0.15  | 102 | 179  | 1.50e7 | 1.30 | 0.25 |    |      |       |      |      |
| 11 | 65   | 9.22e7 | 4.54  | 0.97 | 57 | 118  | 1.49e7 | 1.29   | 0.28  | 103 | 180  | 3.63e6 | 0.32 | 0.07 |    |      |       |      |      |
| 12 | 66   | 1.30e7 | 1.13  | 0.24 | 58 | 119  | 1.89e7 | 1.64   | 0.35  | 104 | 182  | 1.57e6 | 0.14 | 0.03 |    |      |       |      |      |
| 13 | 67   | 1.06e8 | 9.19  | 1.96 | 59 | 120  | 3.27e7 | 2.83   | 0.63  | 105 | 183  | 1.60e6 | 0.14 | 0.03 |    |      |       |      |      |
| 14 | 68   | 1.25e7 | 1.09  | 0.23 | 60 | 121  | 2.27e7 | 1.98   | 0.42  | 106 | 185  | 2.33e6 | 0.22 | 0.05 |    |      |       |      |      |
| 15 | 69   | 1.00e8 | 8.70  | 1.86 | 61 | 122  | 5.92e6 | 0.51   | 0.11  | 107 | 187  | 1.20e6 | 0.10 | 0.02 |    |      |       |      |      |
| 16 | 70   | 5.69e6 | 0.48  | 0.11 | 62 | 123  | 1.09e7 | 0.95   | 0.20  | 108 | 188  | 1.08e7 | 0.94 | 0.20 |    |      |       |      |      |
| 17 | 71   | 2.69e6 | 0.23  | 0.05 | 63 | 124  | 2.73e6 | 0.24   | 0.05  | 109 | 189  | 2.35e6 | 0.20 | 0.04 |    |      |       |      |      |
| 18 | 72   | 1.93e6 | 0.16  | 0.03 | 64 | 127  | 5.96e6 | 0.52   | 0.11  | 110 | 200  | 4.90e6 | 0.43 | 0.09 |    |      |       |      |      |
| 19 | 73   | 2.23e6 | 0.19  | 0.04 | 65 | 128  | 2.72e6 | 0.24   | 0.05  | 111 | 201  | 1.93e6 | 0.17 | 0.04 |    |      |       |      |      |
| 20 | 75   | 1.51e6 | 0.13  | 0.03 | 66 | 129  | 3.87e6 | 0.32   | 0.07  | 112 | 202  | 6.14e6 | 0.53 | 0.11 |    |      |       |      |      |
| 21 | 76   | 3.05e6 | 0.27  | 0.06 | 67 | 130  | 4.16e6 | 0.36   | 0.08  | 113 | 203  | 2.07e7 | 1.80 | 0.38 |    |      |       |      |      |
| 22 | 77   | 1.17e8 | 10.19 | 2.18 | 68 | 131  | 6.37e6 | 0.55   | 0.12  | 114 | 204  | 4.76e6 | 0.41 | 0.09 |    |      |       |      |      |
| 23 | 78   | 3.37e7 | 2.93  | 0.63 | 69 | 132  | 1.21e7 | 1.01   | 0.22  | 115 | 214  | 3.99e6 | 0.35 | 0.07 |    |      |       |      |      |
| 24 | 79   | 1.44e8 | 12.51 | 2.67 | 70 | 133  | 2.14e7 | 1.85   | 0.40  | 116 | 215  | 1.21e6 | 0.10 | 0.02 |    |      |       |      |      |
| 25 | 80   | 3.13e7 | 2.71  | 0.58 | 71 | 134  | 4.45e7 | 3.87   | 0.83  | 117 | 216  | 3.19e7 | 2.77 | 0.59 |    |      |       |      |      |
| 26 | 81   | 7.32e7 | 6.30  | 1.36 | 72 | 135  | 2.97e7 | 2.58   | 0.55  | 118 | 217  | 4.93e6 | 0.43 | 0.09 |    |      |       |      |      |
| 27 | 82   | 2.58e7 | 2.24  | 0.48 | 73 | 136  | 1.58e7 | 0.84   | 0.18  | 119 | 226  | 2.31e6 | 0.20 | 0.04 |    |      |       |      |      |
| 28 | 83   | 2.86e7 | 2.57  | 0.55 | 74 | 137  | 2.30e7 | 2.00   | 0.43  | 120 | 227  | 2.06e6 | 0.18 | 0.04 |    |      |       |      |      |
| 29 | 84   | 2.79e6 | 0.24  | 0.05 | 75 | 138  | 2.54e6 | 0.22   | 0.05  | 121 | 228  | 2.64e6 | 0.23 | 0.05 |    |      |       |      |      |
| 30 | 85   | 1.51e6 | 0.13  | 0.03 | 76 | 142  | 1.49e6 | 0.13   | 0.03  | 122 | 229  | 4.61e6 | 0.40 | 0.09 |    |      |       |      |      |
| 31 | 87   | 2.35e6 | 0.20  | 0.04 | 77 | 143  | 1.17e6 | 0.10   | 0.02  | 123 | 230  | 4.66e6 | 0.40 | 0.09 |    |      |       |      |      |
| 32 | 89   | 7.04e6 | 0.61  | 0.13 | 78 | 144  | 8.92e6 | 0.70   | 0.15  | 124 | 242  | 1.99e7 | 1.73 | 0.37 |    |      |       |      |      |
| 33 | 90   | 6.50e6 | 0.56  | 0.12 | 79 | 145  | 3.87e6 | 0.34   | 0.07  | 125 | 243  | 4.66e6 | 0.41 | 0.09 |    |      |       |      |      |
| 34 | 91   | 1.35e8 | 11.74 | 2.51 | 80 | 146  | 7.85e6 | 0.68   | 0.15  | 126 | 244  | 6.77e6 | 0.59 | 0.13 |    |      |       |      |      |
| 35 | 92   | 2.34e7 | 2.03  | 0.43 | 81 | 147  | 3.09e6 | 0.27   | 0.06  | 127 | 256  | 5.43e6 | 0.21 | 0.05 |    |      |       |      |      |
| 36 | 93   | 9.31e7 | 8.08  | 1.73 | 82 | 148  | 1.26e8 | 10.95  | 2.34  | 128 | 270  | 6.69e6 | 0.58 | 0.12 |    |      |       |      |      |
| 37 | 94   | 2.87e7 | 1.12  | 0.24 | 83 | 149  | 7.15e8 | 62.13  | 13.27 | 129 | 271  | 1.37e6 | 0.12 | 0.03 |    |      |       |      |      |
| 38 | 95   | 4.45e7 | 3.87  | 0.83 | 84 | 150  | 6.23e7 | 5.41   | 1.16  | 130 | 284  | 4.83e6 | 0.42 | 0.09 |    |      |       |      |      |
| 39 | 96   | 6.93e6 | 0.60  | 0.13 | 85 | 151  | 9.81e6 | 0.85   | 0.18  | 131 | 285  | 6.07e7 | 5.01 | 1.00 |    |      |       |      |      |
| 40 | 97   | 5.24e6 | 0.45  | 0.10 | 86 | 152  | 3.72e6 | 0.32   | 0.07  | 132 | 286  | 1.37e7 | 1.19 | 0.25 |    |      |       |      |      |
| 41 | 98   | 2.23e6 | 0.19  | 0.04 | 87 | 158  | 2.43e6 | 0.21   | 0.05  | 133 | 287  | 1.42e6 | 0.12 | 0.03 |    |      |       |      |      |
| 42 | 101  | 3.62e6 | 0.31  | 0.07 | 88 | 159  | 3.13e6 | 0.27   | 0.06  |     |      |        |      |      |    |      |       |      |      |
| 43 | 102  | 1.44e6 | 0.13  | 0.03 | 89 | 160  | 7.98e6 | 0.68   | 0.15  |     |      |        |      |      |    |      |       |      |      |
| 44 | 103  | 6.03e6 | 0.52  | 0.11 | 90 | 161  | 1.16e7 | 1.01   | 0.21  |     |      |        |      |      |    |      |       |      |      |
| 45 | 104  | 2.03e7 | 1.76  | 0.38 | 91 | 162  | 2.24e8 | 19.41  | 4.14  |     |      |        |      |      |    |      |       |      |      |
| 46 | 105  | 1.19e8 | 15.50 | 3.31 | 92 | 163  | 2.73e7 | 2.37   | 0.51  |     |      |        |      |      |    |      |       |      |      |

# Compound 8e

1 2238 (14.293) Cm (2210:2258-(2136:2215+2242:2314))

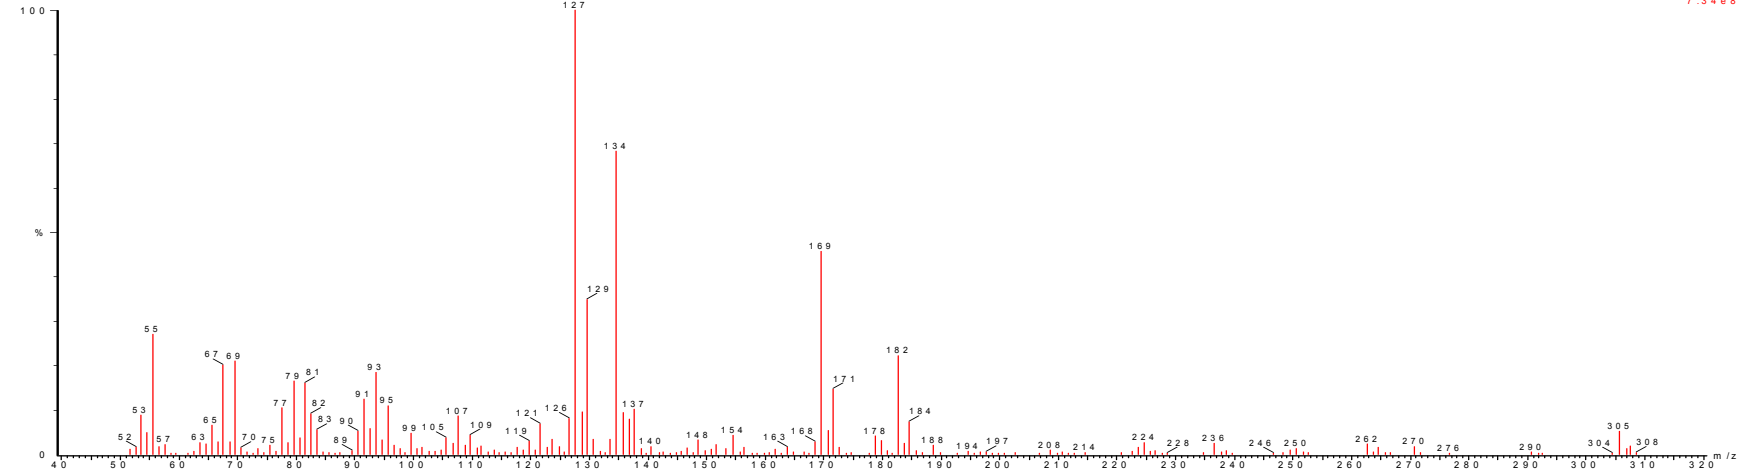

. 08-Jan-2014 + 03:19:38  
Scan E1+  
7.34e8

1 2238 (14.293) Cm (2210:2258-(2136:2215+2242:2314))

| No. | Mass | Inten. | %BPI  | %TIC | No. | Mass | Inten. | %BPI  | %TIC | No. | Mass | Inten. | %BPI  | %TIC | No. | Mass | Inten. | %BPI | %TIC | No. | Mass | Inten. | %BPI | %TIC |
|-----|------|--------|-------|------|-----|------|--------|-------|------|-----|------|--------|-------|------|-----|------|--------|------|------|-----|------|--------|------|------|
| 1   | 51   | 79346  | 1.08  | 0.15 | 47  | 99   | 34747  | 4.73  | 0.65 | 93  | 145  | 46066  | 6.33  | 0.89 | 139 | 199  | 10466  | 0.14 | 0.02 |     |      |        |      |      |
| 2   | 52   | 11247  | 1.52  | 0.21 | 48  | 100  | 91026  | 1.23  | 0.17 | 94  | 146  | 98866  | 1.35  | 0.19 | 140 | 200  | 11966  | 0.20 | 0.03 |     |      |        |      |      |
| 3   | 53   | 64147  | 8.73  | 1.21 | 49  | 101  | 11547  | 1.57  | 0.22 | 95  | 147  | 26566  | 0.36  | 0.05 | 141 | 201  | 18566  | 0.25 | 0.03 |     |      |        |      |      |
| 4   | 54   | 35647  | 4.77  | 0.66 | 50  | 102  | 33246  | 0.53  | 0.07 | 96  | 148  | 23047  | 3.14  | 0.43 | 142 | 202  | 18866  | 0.20 | 0.03 |     |      |        |      |      |
| 5   | 55   | 19846  | 2.69  | 0.37 | 51  | 103  | 48466  | 0.66  | 0.09 | 97  | 149  | 50466  | 0.81  | 0.11 | 143 | 203  | 70966  | 0.07 | 0.13 |     |      |        |      |      |
| 6   | 56   | 12747  | 1.73  | 0.24 | 52  | 104  | 61146  | 0.83  | 0.11 | 98  | 150  | 73666  | 1.00  | 0.14 | 144 | 204  | 13466  | 0.18 | 0.03 |     |      |        |      |      |
| 7   | 57   | 15047  | 2.04  | 0.28 | 53  | 105  | 28047  | 3.54  | 0.49 | 99  | 151  | 15947  | 2.17  | 0.30 | 145 | 210  | 34666  | 0.47 | 0.07 |     |      |        |      |      |
| 8   | 58   | 13146  | 0.18  | 0.02 | 54  | 106  | 17147  | 2.33  | 0.32 | 100 | 153  | 85666  | 1.17  | 0.16 | 146 | 211  | 87066  | 0.12 | 0.02 |     |      |        |      |      |
| 9   | 59   | 11846  | 0.16  | 0.02 | 55  | 107  | 62847  | 8.58  | 1.18 | 101 | 154  | 31447  | 4.28  | 0.59 | 147 | 212  | 12766  | 0.17 | 0.02 |     |      |        |      |      |
| 10  | 61   | 12546  | 0.17  | 0.02 | 56  | 108  | 14647  | 1.99  | 0.27 | 102 | 156  | 28366  | 0.39  | 0.05 | 148 | 214  | 22866  | 0.31 | 0.04 |     |      |        |      |      |
| 11  | 62   | 39646  | 0.54  | 0.07 | 57  | 109  | 31247  | 4.25  | 0.59 | 103 | 158  | 11447  | 1.56  | 0.21 | 149 | 220  | 22766  | 0.31 | 0.04 |     |      |        |      |      |
| 12  | 63   | 19547  | 2.62  | 0.36 | 58  | 110  | 98146  | 1.34  | 0.18 | 104 | 157  | 11546  | 0.16  | 0.02 | 150 | 222  | 43366  | 0.66 | 0.09 |     |      |        |      |      |
| 13  | 64   | 18747  | 2.27  | 0.31 | 59  | 111  | 13747  | 1.86  | 0.26 | 105 | 158  | 13746  | 0.19  | 0.03 | 151 | 223  | 11047  | 1.50 | 0.21 |     |      |        |      |      |
| 14  | 65   | 47947  | 6.52  | 0.90 | 60  | 112  | 28346  | 0.39  | 0.05 | 106 | 159  | 13666  | 0.19  | 0.03 | 152 | 224  | 18947  | 2.58 | 0.36 |     |      |        |      |      |
| 15  | 66   | 19447  | 2.64  | 0.37 | 61  | 113  | 65546  | 0.89  | 0.12 | 107 | 160  | 24946  | 0.34  | 0.05 | 153 | 225  | 43366  | 0.66 | 0.09 |     |      |        |      |      |
| 16  | 67   | 14846  | 2.02  | 0.28 | 62  | 114  | 20246  | 0.28  | 0.04 | 108 | 161  | 79466  | 1.08  | 0.15 | 154 | 226  | 55166  | 0.75 | 0.10 |     |      |        |      |      |
| 17  | 68   | 20047  | 2.72  | 0.38 | 63  | 115  | 31946  | 0.43  | 0.06 | 109 | 162  | 13166  | 0.18  | 0.02 | 155 | 227  | 80146  | 0.11 | 0.02 |     |      |        |      |      |
| 18  | 69   | 13446  | 0.18  | 0.02 | 64  | 116  | 28046  | 0.38  | 0.05 | 110 | 163  | 11647  | 1.58  | 0.22 | 156 | 228  | 84466  | 0.11 | 0.02 |     |      |        |      |      |
| 19  | 70   | 94846  | 0.29  | 0.04 | 65  | 117  | 10547  | 1.44  | 0.20 | 111 | 164  | 33446  | 0.45  | 0.06 | 157 | 234  | 27566  | 0.37 | 0.05 |     |      |        |      |      |
| 20  | 71   | 35246  | 0.48  | 0.07 | 66  | 118  | 21446  | 2.99  | 0.41 | 112 | 165  | 11647  | 1.58  | 0.22 | 158 | 236  | 84466  | 0.11 | 0.02 |     |      |        |      |      |
| 21  | 72   | 13746  | 0.19  | 0.03 | 67  | 119  | 21446  | 2.99  | 0.41 | 113 | 166  | 90466  | 0.12  | 0.02 | 159 | 237  | 28347  | 0.38 | 0.05 |     |      |        |      |      |
| 22  | 73   | 87646  | 1.19  | 0.16 | 68  | 120  | 64346  | 0.88  | 0.12 | 114 | 168  | 20247  | 2.76  | 0.38 | 160 | 238  | 58866  | 0.80 | 0.11 |     |      |        |      |      |
| 23  | 74   | 25046  | 0.34  | 0.05 | 69  | 121  | 24547  | 8.81  | 1.24 | 115 | 169  | 33546  | 4.50  | 0.62 | 161 | 239  | 81446  | 0.11 | 0.02 |     |      |        |      |      |
| 24  | 75   | 14447  | 1.99  | 0.27 | 70  | 122  | 11347  | 1.53  | 0.21 | 116 | 170  | 38347  | 5.22  | 0.72 | 162 | 246  | 10366  | 0.14 | 0.02 |     |      |        |      |      |
| 25  | 76   | 40046  | 0.55  | 0.08 | 71  | 123  | 24547  | 3.34  | 0.46 | 117 | 171  | 10846  | 14.88 | 2.03 | 163 | 248  | 67266  | 0.37 | 0.05 |     |      |        |      |      |
| 26  | 77   | 78847  | 10.47 | 1.45 | 72  | 124  | 11547  | 1.58  | 0.22 | 118 | 172  | 10847  | 1.47  | 0.20 | 164 | 249  | 67266  | 0.37 | 0.05 |     |      |        |      |      |
| 27  | 78   | 18847  | 2.56  | 0.35 | 73  | 127  | 38346  | 0.52  | 0.07 | 119 | 173  | 11946  | 0.16  | 0.02 | 165 | 255  | 87366  | 1.19 | 0.16 |     |      |        |      |      |
| 28  | 79   | 12146  | 0.16  | 0.02 | 74  | 128  | 58847  | 8.00  | 1.11 | 120 | 174  | 24046  | 0.33  | 0.05 | 166 | 251  | 32166  | 0.44 | 0.06 |     |      |        |      |      |
| 29  | 80   | 28447  | 9.10  | 1.26 | 75  | 127  | 24546  | 10.00 | 1.38 | 121 | 177  | 14847  | 2.00  | 0.27 | 167 | 252  | 11746  | 0.16 | 0.02 |     |      |        |      |      |
| 30  | 81   | 11746  | 0.16  | 0.02 | 76  | 128  | 70147  | 9.55  | 1.32 | 122 | 178  | 20847  | 4.03  | 0.56 | 168 | 262  | 18247  | 2.21 | 0.30 |     |      |        |      |      |
| 31  | 82   | 64847  | 9.10  | 1.26 | 77  | 129  | 24546  | 34.76 | 4.80 | 123 | 177  | 22347  | 3.04  | 0.42 | 169 | 263  | 30466  | 0.41 | 0.06 |     |      |        |      |      |
| 32  | 83   | 40347  | 5.49  | 0.76 | 78  | 130  | 23947  | 3.26  | 0.45 | 124 | 180  | 55846  | 0.76  | 0.10 | 170 | 264  | 18847  | 1.47 | 0.20 |     |      |        |      |      |
| 33  | 84   | 37946  | 0.52  | 0.07 | 79  | 131  | 48646  | 0.66  | 0.09 | 125 | 181  | 48646  | 0.66  | 0.09 | 171 | 265  | 18847  | 1.47 | 0.20 |     |      |        |      |      |
| 34  | 85   | 29846  | 0.28  | 0.04 | 80  | 132  | 18946  | 0.26  | 0.04 | 126 | 182  | 18246  | 2.09  | 0.29 | 172 | 266  | 18366  | 0.25 | 0.03 |     |      |        |      |      |
| 35  | 86   | 6946   | 0.09  | 0.01 | 81  | 133  | 24546  | 0.34  | 0.05 | 127 | 183  | 17947  | 2.44  | 0.34 | 173 | 270  | 18847  | 1.47 | 0.20 |     |      |        |      |      |
| 36  | 87   | 18946  | 0.26  | 0.04 | 82  | 134  | 50046  | 6.81  | 0.94 | 128 | 184  | 53147  | 7.23  | 1.00 | 174 | 271  | 18847  | 0.27 | 0.04 |     |      |        |      |      |
| 37  | 89   | 60246  | 0.82  | 0.11 | 83  | 135  | 68947  | 9.38  | 1.30 | 129 | 185  | 51446  | 0.70  | 0.10 | 175 | 268  | 18366  | 0.25 | 0.03 |     |      |        |      |      |
| 38  | 90   | 38147  | 5.20  | 0.72 | 84  | 136  | 57347  | 7.81  | 1.08 | 130 | 186  | 17846  | 0.24  | 0.03 | 176 | 290  | 33366  | 0.49 | 0.07 |     |      |        |      |      |
| 39  | 91   | 91147  | 12.41 | 1.71 | 85  | 137  | 68947  | 10.08 | 1.39 | 131 | 187  | 73847  | 10.08 | 1.39 | 177 | 289  | 18366  | 0.25 | 0.03 |     |      |        |      |      |
| 40  | 92   | 41847  | 5.69  | 0.79 | 86  | 138  | 91346  | 1.24  | 0.17 | 132 | 189  | 18646  | 0.25  | 0.04 | 178 | 292  | 12066  | 0.16 | 0.02 |     |      |        |      |      |
| 41  | 93   | 27946  | 0.38  | 0.05 | 87  | 139  | 91346  | 1.24  | 0.17 | 133 | 189  | 18646  | 0.25  | 0.04 | 179 | 293  | 18366  | 0.25 | 0.03 |     |      |        |      |      |
| 42  | 94   | 27946  | 0.38  | 0.05 | 88  | 140  | 91346  | 1.24  | 0.17 | 134 | 192  | 48146  | 0.65  | 0.09 | 180 | 305  | 87766  | 1.12 | 0.15 |     |      |        |      |      |
| 43  | 96   | 11547  | 0.16  | 0.02 | 89  | 141  | 11547  | 0.16  | 0.02 | 135 | 194  | 11546  | 0.16  | 0.02 | 181 | 306  | 97766  | 1.24 | 0.17 |     |      |        |      |      |
| 44  | 96   | 11547  | 0.16  | 0.02 | 90  | 142  | 20846  | 0.28  | 0.04 | 136 | 196  | 31146  | 0.42  | 0.06 | 182 | 307  | 18847  | 1.47 | 0.20 |     |      |        |      |      |
| 45  | 97   | 92346  | 1.26  | 0.17 | 91  | 143  | 13646  | 0.19  | 0.03 | 137 | 197  | 31346  | 0.43  | 0.06 | 183 | 308  | 21366  | 0.29 | 0.04 |     |      |        |      |      |
| 46  | 98   | 25346  | 0.34  | 0.05 | 92  | 144  | 24446  | 0.33  | 0.05 | 138 | 198  | 11546  | 0.16  | 0.02 |     |      |        |      |      |     |      |        |      |      |

. 08-Jan-2014 + 03:19:38  
Scan E1+

# Compound 8f

08-Jan-2014 + 03:19:38  
Scan E1+  
6.09e8

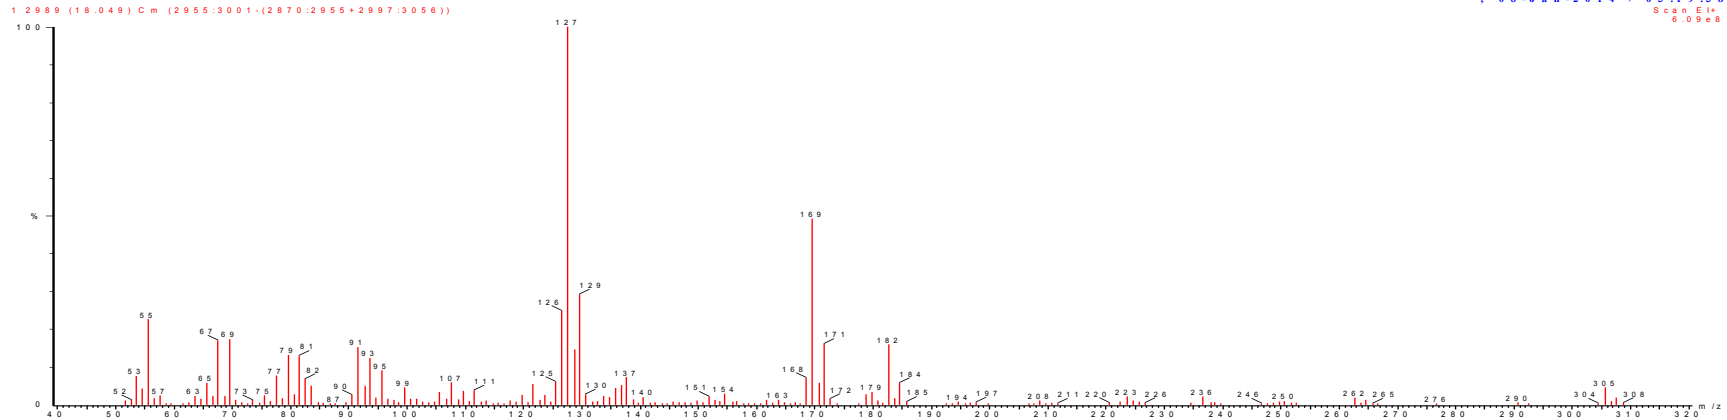

1 2989 (18.049) C m (2955:3001-(2870:2955+2997:3056))

| No | Mass | Inten | %BPI  | %TIC | No | Mass | Inten | %BPI  | %TIC  | No  | Mass | Inten | %BPI  | %TIC | No  | Mass | Inten  | %BPI | %TIC |
|----|------|-------|-------|------|----|------|-------|-------|-------|-----|------|-------|-------|------|-----|------|--------|------|------|
| 1  | 51   | 57186 | 0.94  | 0.16 | 47 | 99   | 28297 | 4.32  | 0.73  | 93  | 146  | 31956 | 0.90  | 0.10 | 139 | 203  | 69066  | 0.11 | 0.02 |
| 2  | 52   | 60060 | 0.99  | 0.17 | 48 | 100  | 84266 | 1.38  | 0.23  | 94  | 146  | 23466 | 0.39  | 0.07 | 140 | 206  | 53366  | 0.88 | 0.15 |
| 3  | 53   | 45067 | 7.46  | 1.25 | 49 | 101  | 73966 | 1.31  | 0.22  | 95  | 147  | 26566 | 0.44  | 0.07 | 141 | 209  | 117466 | 0.19 | 0.03 |
| 4  | 54   | 24467 | 4.00  | 0.68 | 50 | 102  | 34466 | 0.57  | 0.10  | 96  | 148  | 15266 | 0.25  | 0.04 | 142 | 210  | 20866  | 0.34 | 0.09 |
| 5  | 55   | 13666 | 22.42 | 3.79 | 51 | 103  | 31166 | 0.51  | 0.09  | 97  | 149  | 54466 | 0.89  | 0.15 | 143 | 211  | 62566  | 0.10 | 0.02 |
| 6  | 56   | 93466 | 1.53  | 0.26 | 52 | 104  | 38566 | 0.63  | 0.11  | 98  | 150  | 31866 | 0.52  | 0.09 | 144 | 220  | 20466  | 0.34 | 0.06 |
| 7  | 57   | 13767 | 2.25  | 0.38 | 53 | 105  | 19167 | 3.14  | 0.53  | 99  | 151  | 12267 | 2.01  | 0.34 | 145 | 222  | 39866  | 0.66 | 0.11 |
| 8  | 58   | 11366 | 0.19  | 0.03 | 54 | 106  | 84366 | 1.38  | 0.23  | 100 | 152  | 62666 | 1.00  | 0.17 | 146 | 223  | 11867  | 1.95 | 0.33 |
| 9  | 59   | 11866 | 0.19  | 0.03 | 55 | 107  | 35167 | 5.77  | 0.98  | 101 | 153  | 42766 | 0.70  | 0.12 | 147 | 224  | 52066  | 0.85 | 0.14 |
| 10 | 61   | 90466 | 0.15  | 0.03 | 56 | 108  | 70866 | 1.16  | 0.20  | 102 | 154  | 13567 | 2.72  | 0.46 | 148 | 225  | 38666  | 0.63 | 0.11 |
| 11 | 62   | 30966 | 0.51  | 0.09 | 57 | 109  | 21367 | 3.50  | 0.59  | 103 | 155  | 32466 | 0.53  | 0.09 | 149 | 226  | 14966  | 0.25 | 0.04 |
| 12 | 63   | 12667 | 2.11  | 0.36 | 58 | 110  | 46566 | 0.76  | 0.13  | 104 | 156  | 64366 | 0.79  | 0.13 | 150 | 234  | 18366  | 0.30 | 0.05 |
| 13 | 64   | 84266 | 1.38  | 0.23 | 59 | 111  | 21667 | 3.54  | 0.60  | 105 | 157  | 80766 | 0.13  | 0.02 | 151 | 236  | 11867  | 1.93 | 0.33 |
| 14 | 65   | 34067 | 5.59  | 0.95 | 60 | 112  | 32066 | 0.54  | 0.09  | 106 | 158  | 63866 | 0.11  | 0.02 | 152 | 237  | 27066  | 0.44 | 0.08 |
| 15 | 66   | 12567 | 2.12  | 0.36 | 61 | 113  | 56966 | 0.94  | 0.16  | 107 | 159  | 10166 | 0.17  | 0.03 | 153 | 238  | 31366  | 0.51 | 0.09 |
| 16 | 67   | 10366 | 16.88 | 2.86 | 62 | 114  | 92566 | 0.15  | 0.03  | 108 | 160  | 67066 | 0.11  | 0.02 | 154 | 239  | 63466  | 0.10 | 0.02 |
| 17 | 68   | 13067 | 2.14  | 0.36 | 63 | 115  | 20366 | 0.33  | 0.06  | 109 | 161  | 66966 | 1.10  | 0.19 | 155 | 246  | 94766  | 0.16 | 0.03 |
| 18 | 69   | 13566 | 17.22 | 2.91 | 64 | 116  | 13566 | 0.22  | 0.04  | 110 | 162  | 10966 | 0.28  | 0.05 | 156 | 247  | 63466  | 0.10 | 0.02 |
| 19 | 70   | 63566 | 1.05  | 0.18 | 65 | 117  | 58766 | 0.06  | 0.16  | 111 | 163  | 67066 | 1.10  | 0.19 | 157 | 248  | 17066  | 0.28 | 0.05 |
| 20 | 71   | 28766 | 0.44  | 0.07 | 66 | 118  | 32566 | 0.53  | 0.09  | 112 | 164  | 23766 | 0.47  | 0.08 | 158 | 249  | 38866  | 0.64 | 0.11 |
| 21 | 72   | 13666 | 0.22  | 0.04 | 67 | 119  | 14667 | 2.39  | 0.40  | 113 | 165  | 84266 | 0.14  | 0.02 | 159 | 250  | 45266  | 0.74 | 0.13 |
| 22 | 73   | 67766 | 1.11  | 0.19 | 68 | 120  | 30066 | 0.49  | 0.08  | 114 | 166  | 20866 | 0.49  | 0.08 | 160 | 251  | 19766  | 0.32 | 0.05 |
| 23 | 74   | 18766 | 0.31  | 0.05 | 69 | 121  | 32467 | 5.32  | 0.90  | 115 | 167  | 10366 | 0.17  | 0.03 | 161 | 252  | 14166  | 0.23 | 0.04 |
| 24 | 75   | 13667 | 2.23  | 0.38 | 70 | 122  | 66966 | 1.10  | 0.19  | 116 | 168  | 42567 | 6.99  | 1.18 | 162 | 262  | 97266  | 1.60 | 0.27 |
| 25 | 76   | 46566 | 1.57  | 0.27 | 71 | 123  | 15167 | 2.47  | 0.42  | 117 | 169  | 23966 | 4.19  | 0.73 | 163 | 263  | 17566  | 0.29 | 0.05 |
| 26 | 77   | 45967 | 7.55  | 1.28 | 72 | 124  | 37466 | 0.61  | 0.10  | 118 | 170  | 33967 | 5.57  | 0.94 | 164 | 264  | 68366  | 1.12 | 0.19 |
| 27 | 78   | 90566 | 1.57  | 0.27 | 73 | 125  | 15467 | 6.81  | 1.18  | 119 | 171  | 97667 | 16.04 | 2.71 | 165 | 265  | 11966  | 0.19 | 0.03 |
| 28 | 79   | 79167 | 13.00 | 2.20 | 74 | 126  | 15066 | 24.65 | 4.17  | 120 | 172  | 81866 | 1.34  | 0.23 | 166 | 266  | 10566  | 0.17 | 0.03 |
| 29 | 80   | 15767 | 2.57  | 0.44 | 75 | 127  | 61966 | 10.00 | 16.92 | 121 | 173  | 75966 | 0.33  | 0.05 | 167 | 276  | 10766  | 0.18 | 0.03 |
| 30 | 81   | 77867 | 12.78 | 2.16 | 76 | 128  | 87967 | 14.45 | 2.44  | 122 | 177  | 95566 | 0.16  | 0.03 | 168 | 290  | 25766  | 0.42 | 0.07 |
| 31 | 82   | 43967 | 6.92  | 1.14 | 77 | 129  | 61966 | 29.09 | 4.92  | 123 | 178  | 13267 | 3.00  | 0.42 | 169 | 302  | 64966  | 0.14 | 0.03 |
| 32 | 83   | 23967 | 0.39  | 0.07 | 78 | 130  | 15266 | 0.89  | 0.15  | 124 | 179  | 13867 | 2.09  | 0.35 | 170 | 304  | 63866  | 0.15 | 0.03 |
| 33 | 84   | 29166 | 0.48  | 0.08 | 79 | 131  | 36466 | 0.60  | 0.10  | 125 | 180  | 59266 | 0.92  | 0.16 | 171 | 305  | 26967  | 4.41 | 0.75 |
| 34 | 85   | 77766 | 0.33  | 0.06 | 80 | 132  | 61566 | 0.69  | 0.12  | 126 | 181  | 11266 | 0.28  | 0.05 | 172 | 306  | 16266  | 0.24 | 0.04 |
| 35 | 86   | 68966 | 0.11  | 0.02 | 81 | 133  | 12767 | 2.08  | 0.35  | 127 | 182  | 99667 | 15.88 | 2.69 | 173 | 307  | 10067  | 1.64 | 0.28 |
| 36 | 87   | 77466 | 0.12  | 0.02 | 82 | 134  | 10767 | 1.76  | 0.30  | 128 | 183  | 61366 | 1.07  | 0.18 | 174 | 308  | 15366  | 0.25 | 0.04 |
| 37 | 89   | 30566 | 0.50  | 0.09 | 83 | 135  | 25767 | 4.21  | 0.71  | 129 | 184  | 33967 | 5.57  | 0.94 |     |      |        |      |      |
| 38 | 90   | 14767 | 2.42  | 0.41 | 84 | 136  | 30767 | 5.04  | 0.85  | 130 | 185  | 63366 | 0.10  | 0.02 |     |      |        |      |      |
| 39 | 91   | 91467 | 15.02 | 2.54 | 85 | 137  | 42767 | 7.02  | 1.19  | 131 | 192  | 93166 | 0.15  | 0.03 |     |      |        |      |      |
| 40 | 92   | 29067 | 4.75  | 0.81 | 86 | 138  | 73466 | 1.21  | 0.20  | 132 | 193  | 63366 | 0.10  | 0.02 |     |      |        |      |      |
| 41 | 93   | 74467 | 12.22 | 2.07 | 87 | 139  | 20866 | 0.34  | 0.06  | 133 | 194  | 37266 | 0.61  | 0.10 |     |      |        |      |      |
| 42 | 94   | 93066 | 1.51  | 0.27 | 88 | 140  | 18967 | 1.79  | 0.30  | 134 | 195  | 63366 | 0.10  | 0.02 |     |      |        |      |      |
| 43 | 95   | 54167 | 8.89  | 1.51 | 89 | 141  | 17966 | 0.29  | 0.05  | 135 | 196  | 23466 | 0.34  | 0.06 |     |      |        |      |      |
| 44 | 96   | 61466 | 1.38  | 0.23 | 90 | 142  | 31466 | 0.52  | 0.09  | 136 | 197  | 24866 | 0.41  | 0.07 |     |      |        |      |      |
| 45 | 97   | 68466 | 1.12  | 0.19 | 91 | 143  | 11266 | 0.18  | 0.03  | 137 | 199  | 10466 | 0.17  | 0.03 |     |      |        |      |      |
| 46 | 98   | 24866 | 0.41  | 0.07 | 92 | 144  | 12766 | 0.21  | 0.04  | 138 | 206  | 10766 | 0.18  | 0.03 |     |      |        |      |      |
